# Supplementary material
Source: PubMed Central journal article supplement (PMC5607143)
Supplement: mmc2.pdf [file mmc2.pdf]

# Membrane Curvature and Lipid Composition Synergize To Regulate N-Ras Anchor Recruitment

Jannik B. Larsen,<sup>1</sup> Celeste Kennard,<sup>2</sup> Søren L. Pedersen,<sup>3</sup> Knud J. Jensen,<sup>3</sup> Mark J. Uline,<sup>2,\*</sup> Nikos S. Hatzakis,<sup>1</sup> and Dimitrios Stamou<sup>1,\*</sup>

<sup>1</sup>Bionanotechnology and Nanomedicine Laboratory, Nano-Science Center, Lundbeck Foundation Center Biomembranes in Nanomedicine, Department of Chemistry, University of Copenhagen, Copenhagen, Denmark; <sup>2</sup>Department of Chemical Engineering, University of South Carolina, Columbia, South Carolina; and <sup>3</sup>Lundbeck Foundation Center Biomembranes in Nanomedicine, Department of Chemistry, University of Copenhagen, Frederiksberg, Denmark

**ABSTRACT** Proteins anchored to membranes through covalently linked fatty acids and/or isoprenoid groups play crucial roles in all forms of life. Sorting and trafficking of lipidated proteins has traditionally been discussed in the context of partitioning to membrane domains of different lipid composition. We recently showed that membrane shape/curvature can in itself mediate the recruitment of lipidated proteins. However, exactly how membrane curvature and composition synergize remains largely unexplored. Here we investigated how three critical structural parameters of lipids, namely acyl chain saturation, headgroup size, and acyl chain length, modulate the capacity of membrane curvature to recruit lipidated proteins. As a model system we used the lipidated minimal membrane anchor of the GTPase, N-Ras (tN-Ras). Our data revealed complex synergistic effects, whereby tN-Ras binding was higher on planar DOPC than POPC membranes, but inversely higher on curved POPC than DOPC membranes. This variation in the binding to both planar and curved membranes leads to a net increase in the recruitment by membrane curvature of tN-Ras when reducing the acyl chain saturation state. Additionally, we found increased recruitment by membrane curvature of tN-Ras when substituting PC for PE, and when decreasing acyl chain length from 14 to 12 carbons (DMPC versus DLPC). However, these variations in recruitment ability had different origins, with the headgroup size primarily influencing tN-Ras binding to planar membranes whereas the change in acyl chain length primarily affected binding to curved membranes. Molecular field theory calculations recapitulated these findings and revealed lateral pressure as an underlying biophysical mechanism dictating how curvature and composition synergize to modulate recruitment of lipidated proteins. Our findings suggest that the different compositions of cellular compartments could modulate the potency of membrane curvature to recruit lipidated proteins and thereby synergistically regulate the trafficking and sorting of lipidated proteins.

## INTRODUCTION

Proteins anchored to the membrane through covalently linked fatty acids and/or isoprenoid groups are found in all forms of life, with >500 in humans alone (1). Importantly, lipidation of proteins like the HIV Gag proteins, Src Family kinases, and Ras GTPases is tightly linked to protein function by facilitating membrane binding and sorting (2,3), and misregulation of lipidation is associated with severe diseases (4).

The lipid composition of organelles has traditionally been considered extremely important for regulating the cellular organization of lipidated proteins through the preferential partitioning between membrane domains with distinct compositional properties (5–7). The functional significance of the organelle lipid composition is further supported by the active preservation of the compartment-specific localization of selective lipid species (8,9). One example of this is the systematic variation in the gradient of some lipid types along the ER-Golgi-Plasma membrane secretory pathway, a pathway believed to facilitate lipidated protein trafficking (10). However, recently we introduced an additional organizational cue, when we showed lipidated proteins to be selectively recruited by membrane curvature (11,12).

Indeed, close examination reveals that the shape of membrane organelles is a highly conserved and regulated cellular phenotype (13,14). The fact that both composition and morphology is highly conserved suggests that lipidated

Submitted September 26, 2016, and accepted for publication June 27, 2017.

\*Correspondence: [stamou@nano.ku.dk](mailto:stamou@nano.ku.dk) or [uline@cec.sc.edu](mailto:uline@cec.sc.edu)

Jannik B. Larsen's present address is Department of Micro- and Nanotechnology, Centre for Nanomedicine and Theranostics, DTU Nanotech, Technical University of Denmark, 2800 Kng. Lyngby, Denmark.

Søren L. Pedersen's present address is Gubra Aps, 2970 Hørsholm, Denmark.

Nikos S. Hatzakis's present address is Department of Chemistry, Nano-Science Center, University of Copenhagen, 2100 Copenhagen, Denmark.

Editor: Anne Kenworthy.

<http://dx.doi.org/10.1016/j.bpj.2017.06.051>

© 2017 Biophysical Society.

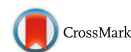

protein trafficking and sorting may depend on the compartment-specific combinations of membrane composition and morphology; nevertheless, how these might synergize to facilitate selective recruitment of lipidated proteins to membranes remains largely unexplored.

Here we used a lipidated protein model system comprising the membrane anchoring C-tail motif of the GTPase N-Ras (tN-Ras), which controls eukaryotic cell proliferation and survival and constitutes one of the most frequently mutated genes in cancer tumors (15,16). We employed the dual lipidated (palmitoyl and farnesyl) model peptide in combination with a single liposome-based assay to study how biologically relevant variations in bilayer lipid shape properties (headgroup size, degree of acyl chain saturation, and acyl chain length) affected the membrane curvature-selective recruitment of the bilayer. We show that modulating lipid shape by either reducing PE concentration, increasing the degree of saturated acyl chains, or reducing lipid length all increased the potency by which tN-Ras was recruited by membrane curvature. Molecular field theory calculations revealed lipid shape-dependent variations in the curvature-mediated relief in the lipid packing density of the outer leaflet as the molecular mechanism underlying the differences in the recruitment ability between membrane systems. Our results demonstrated how bilayer lipid shape and membrane curvature synergize in regulating the selective recruitment of lipidated proteins, and we propose that cells might use their inherent compositional heterogeneity between cellular compartments to modulate the curvature-selective recruitment of lipidated proteins.

## MATERIALS AND METHODS

### Materials

1,2-Dioleoyl-*sn*-glycero-3-phosphocholine (DOPC), 1,2-dioleoyl-*sn*-glycero-3-phosphatidylserine, 1,2-dioleoyl-*sn*-glycero-3-phosphatidylethanolamine-N-(cap biotinyl), 1-palmitoyl-2-oleoyl-*sn*-glycero-phosphocholine (POPC), 1-palmitoyl-2-oleoyl-*sn*-glycero-phosphatidylserine, 1,2-dioleoyl-*sn*-glycero-3-phosphoethanolamine (DOPE), 1,2-dilauroyl-*sn*-glycero-3-phosphocholine (DLPC), 1,2-dioleoyl-*sn*-glycero-3-phosphatidylserine, 1,2-myristoyl-*sn*-glycero-3-phosphocholine (DMPC), and 1,2-dimyristoyl-*sn*-glycero-3-phosphatidylserine were all acquired from Avanti Polar Lipids (Alabaster, AL). 1,2-Dioleoyl-*sn*-glycero-3-phosphatidylethanolamine-Atto655 (DOPE-Atto655) was acquired from Atto-Tec (Siegen, Germany). For specific lipid compositions, please see the [Supporting Material](#). The tN-Ras-Alexa488 (tN-Ras) peptide was synthesized and handled as described in Larsen et al. (11).

### Liposome preparation

Liposomes were prepared using a previously described lipid hydration method (12,17). In brief, lipids dissolved in chloroform were thoroughly mixed in a glass vial, at the molar ratios described in the previous section. The solution was dried under nitrogen flow and incubated in vacuum for 4 h. Liposomes were rehydrated by carefully adding a 200 mM D-Sorbitol solution to the lipid film, for a final lipid concentration of 1 g/L. The mixture was incubated overnight at 50°C, which is above the melting temperature of

all lipid components, ensuring that lipid film rehydration occurs from a fluid state. The liposomes were then subjected to 10 freeze-thaw cycles to minimize multilamellarity, by immersion in liquid nitrogen followed by thawing in a water bath. After freeze thawing, liposomes were extruded once through a single Isopore polycarbonate membrane with a pore size of 800 nm from Millipore (Billerica, MA) in a Mini-Extruder (Avanti Polar Lipids, Alabaster, AL). The liposomes were flash frozen in liquid nitrogen and stored at −21°C. We have previously shown, using electron microscopy imaging, that the multilamellarity of our liposome preparations is negligible (<5%) (12) and that variation of membrane curvature within the ensemble does not skew the average liposome composition (11,18,19).

### Single liposome curvature assay

We used the single liposome curvature (SLiC) assay along with the tN-Ras peptide, as described in Larsen et al. (11). We rely on the intrinsic size polydispersity of unilamellar liposomes that are formed during freeze thawing, thus the final single extrusion step through an 800-nm pore filter merely eliminates large aggregates (20). Therefore we are imaging a wide range of curvatures with access to the individual diameters at the single liposome level. In brief, vesicles were labeled by including 1 mol % of DOPE-Atto655 and immobilized on a passivated glass surface. tN-Ras kept in DMSO was added to the solution and allowed to bind at saturating conditions of 1 μM. The final DMSO concentration was kept <0.5%. After a 10 min equilibration period, we sequentially acquired confocal fluorescence micrographs for both membrane (Atto-655) and tN-Ras (Alexa488) channels.

As previously published (12,20,21), we can extract the integrated intensity of the membrane dye and convert liposome intensity to diameter, because the integrated intensity of the membrane label is proportional to the number of membrane dyes, which scales with the surface area (12,20,21). The liposome diameter is consequently proportional to the square root of the integrated intensity, scaled by a calibration factor. The calibration factor is obtained from a reference sample, produced by extruding liposomes 20 times through a 50-nm filter to ensure as narrow a size distribution as possible. The mean diameter of this population is now measured using dynamic light scattering and correlated to the mean integrated intensity calculated from an intensity histogram obtained by imaging the control sample at the microscope (20). The accuracy of this calibration approach has been validated using cryo-electron microscopy, and from this independent technique we estimated a ±5 nm uncertainty on the liposome diameter determined by the fluorescence approach (20).

For each liposome, the integrated Alexa488 intensity scales with the number of bound tN-Ras peptides and the integrated DOPE-Atto655 intensity scales with the surface area, thus the intensity ratio gives us the absolute density in arbitrary units (11,12,21). We then convert the absolute density to normalized densities by dividing all data points with the fit value found at 400 nm in diameter (11,12,21). All experiments were performed in a 10 mM HEPES, 95 mM NaCl, pH 7.4 buffer. Neither the immobilization (22) nor the binding of tN-Ras influenced liposome shape (11). Furthermore, tN-Ras binding was investigated under equilibrium conditions, as previously demonstrated by fluorescence recovery after photobleaching experiments (11). It is known that Alexa488 essentially does not interact with membranes (23), and we have previously demonstrated that the attachment of Alexa488 or other fluorophores does not impede the recruitment by membrane curvature of lipid anchors (11). In principle, curvature could impose sorting of the membrane lipids of the liposomes, which would tend to negate any curvature-dependent distortion of lipid packing. Some theoretical calculations suggest that lipids with very high intrinsic spontaneous curvature (like lyso-lipids) could be significantly sorted by high membrane curvatures, although this has not been experimentally validated. On the contrary, for the majority of lipids with smaller intrinsic spontaneous curvatures, both experimental and theoretical studies have concluded that lateral sorting of lipids by membrane curvatures found *in vivo* is energetically unfavorable, due to the entropic cost of lipid demixing (24–30). The only way to overcome

this limitation is to bestow the individual lipids with collective properties. Thus, the examples where lipids have been shown to be laterally sorted by curvature are limited to membrane systems close to a phase separation (29,31) or if individual lipids are cross-linked (28). In this work, we are taking extra care not to work with systems close to a phase separation or lipid dyes shown to cluster. Finally, we used previously published data sets to validate that lipid lateral sorting based on lipid spontaneous curvature does not occur in the SLiC assay through control experiments with premixed pairs of lipid fluorophores displaying a constant average intensity ratio value, as a function of liposome diameter (18,19) (Fig. S1).

## Equipment and settings

For imaging liposomes and tN-Ras, we used a TCS SP5 inverted confocal microscope and an oil immersion objective HCX PL APO CS  $\times 100$  (NA 1.4); Leica Microsystems, Wetzlar, Germany. Detection of Alexa488 labeled tN-Ras was performed at 495–580 nm (exc. 488 nm); detection of Atto655-labeled vesicles was performed at 640–750 nm (exc. 633 nm) using photomultipliers. In all cases, sequential imaging was used to avoid cross excitation. Images had a resolution of  $2048 \times 2048$  pixels, with a pixel size of 25.2 nm and a bit depth of 16. Temperature control ( $\pm 0.5^\circ\text{C}$ ) in the microscope chamber was achieved by enclosing the entire

microscope within a box heated by stable air flow (The Cube 2 Temperature Controller; Life Imaging Services, Basel, Switzerland). All experiments were performed at  $22^\circ\text{C}$ , except for the DLPC and DMPC experiments, which were performed at  $30^\circ\text{C}$ . Image analysis and data treatment were performed using custom-made routines in the softwares Igor Pro (WaveMetrics, Lake Oswego, OR) and Fiji (ImageJ; National Institutes of Health, Bethesda, MD).

## RESULTS

### Modulating acyl chain saturation affects tN-Ras binding to both curved and planar membranes

To study how variations in lipid shape affected the selective recruitment by membrane curvature, we used tN-Ras and our previously described SLiC assay (11,12,17). We employed fluorescently labeled liposomes, immobilized on a passivated glass surface, and allowed fluorescently labeled tN-Ras to bind from solution (Fig. 1 A). Tuning the density of liposomes on the surface allowed us to image individual

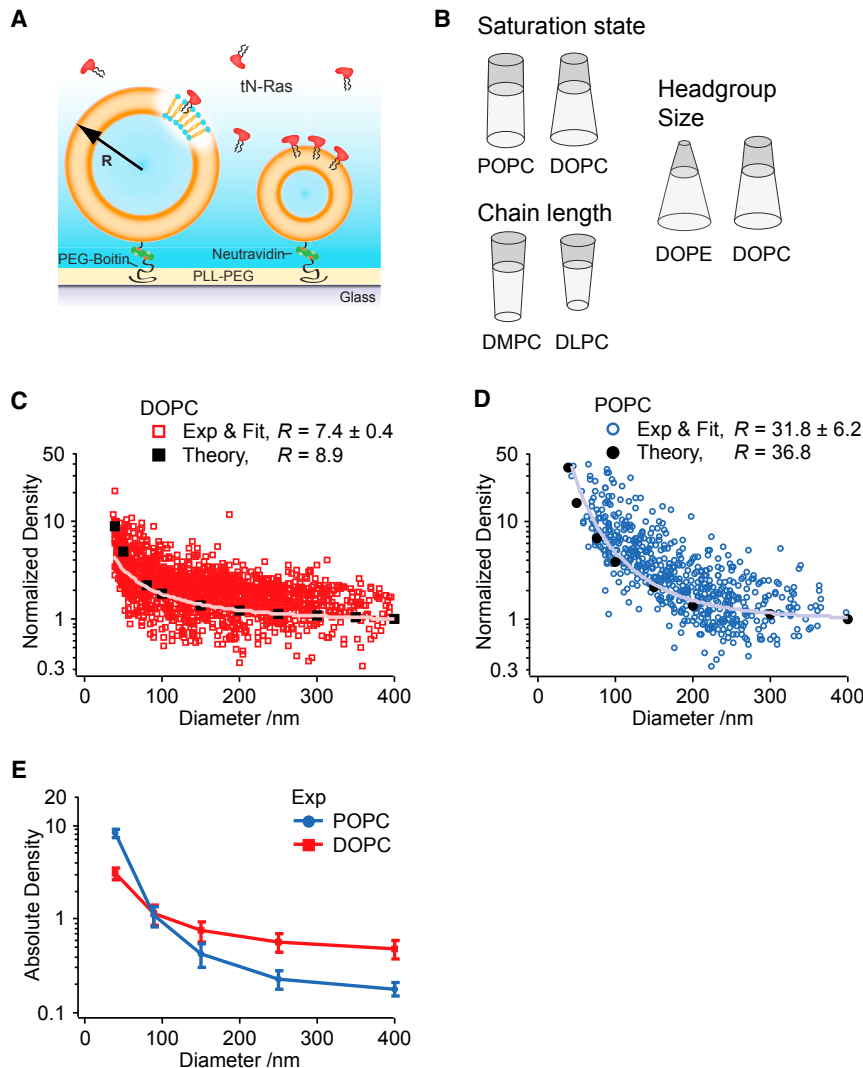

**FIGURE 1** Recruitment by membrane curvature of tN-Ras is modulated by lipid shape. (A) Shown here is a single liposome curvature assay for studying the effect of membrane composition on the recruitment by membrane curvature of tN-Ras. Single liposomes of various sizes and thus curvatures are immobilized on a passivated surface and tN-Ras is bound from solution. By imaging fluorescently marked liposomes and tN-Ras with confocal microscopy, liposome diameter and tN-Ras density on individual liposomes was quantified. (B) Given here is an illustration of the lipid shapes compared in the study, highlighting how lipid shape is determined by the relation between the volume of the headgroup (*dark gray*) and acyl chains (*light gray*). (C) Shown here is normalized tN-Ras density as a function of liposome diameter for liposomes prepared from DOPC lipids (*dark red markers*) with corresponding off-set power function fit (*light red line*) and molecular field theory calculations depicting the equilibrium binding concentrations of tN-Ras on DOPC membranes (*black markers*). The recruitment ratio ( $R$ ) represents the increase in tN-Ras density when reducing the diameter by a factor of 10 as quantified either from power function fitting to the experimental data or from the theoretical calculations. (D) Given here is normalized tN-Ras density and experimental fit as a function of liposome diameter for liposomes prepared from POPC lipids (*dark-blue markers* and *light-blue line*) and molecular field theory calculations depicting the equilibrium binding concentrations of tN-Ras on POPC membranes (*black markers*).  $R$  is reported as the average mean  $\pm$  SE of  $n_{\text{DOPC}} = 9$  and  $n_{\text{POPC}} = 8$  independent experiments. (E) Given here is average absolute tN-Ras density on either POPC (*blue*) or DOPC (*red*) membranes, calculated from the power function fits to the individual experimental data set for five liposome diameters.

liposomes using confocal microscopy and to extract the integrated intensities of both the membrane dye (DOPE-Atto655) and the tN-Ras dye (Alexafluor488) in a parallel manner ( $>100$  liposomes/frame). Because immobilization does not perturb the spherical shape of individual liposomes (22), we could convert their integrated Atto655 membrane dye intensity to liposome diameter in units of nanometers, using a combination of microscopy and dynamic light scattering, as described in Kunding et al. (20). Because we previously demonstrated tN-Ras to display reversible membrane binding and knowing that the integrated intensity arising from fluorescently labeled tN-Ras is proportional to the number of molecules, the ratio of the integrated Alexa488 and Atto655 intensities allowed us to calculate the absolute density of bound tN-Ras on individual liposomes of various curvatures (11,12).

Lipid shape is determined by the relation between the acyl chain and headgroup volume and is traditionally represented by three classes: cones, inverted cones, and cylinders (32) (Fig. 1 B). We first modulated lipid shape by employing liposomes in the SLiC assay produced from POPC (one saturated, one mono-unsaturated acyl chain, with relatively compact cylindrical lipid shape) or DOPC (two mono-unsaturated chains, with relatively less-compact inverted cone lipid shape) (33) (Fig. 1 B). To facilitate an easier comparison between the two systems, we converted the obtained absolute density data to normalized densities (by normalizing to a density of 1 for a liposome diameter of 400 nm) and plotted the normalized tN-Ras density on individual DOPC or POPC liposomes as a function of diameter (Fig. 1, C and D).

To quantify the correlation between membrane curvature and tN-Ras density, we fitted the data of Fig. 1, C and D, with an off-set power function as described in Larsen et al. (11) (and see Supporting Material). This allowed us to extract the recruitment ratio ( $R$ ) as the fold-increase in tN-Ras density, when reducing the diameter by a factor of 10. We quantified  $R = 7.4 \pm 0.4$  for the DOPC system and  $R = 31.8 \pm 6.2$  for the POPC system (Fig. 1, C and D), whereas a negative control, binding streptavidin to biotinylated lipids, gave  $R = 1.01 \pm 0.01$  (Fig. S2). This demonstrated a significant selective recruitment of tN-Ras by membrane curvature for both the DOPC and POPC systems, relative to the negative control.

Thus our experiments revealed an approximately four-fold increase in the selective recruitment by membrane curvature for the POPC system compared to the DOPC system, illustrating that lipid shape can have a pronounced effect on the selective recruitment of tN-Ras by membrane curvature.

The ability of the SLiC assay to measure the absolute binding densities of tN-Ras allowed us to decipher if the change in the selective recruitment by membrane curvature originated from variations in the binding densities only on curved membranes, only on planar membranes, or both.

For each individual dataset we calculated the absolute density from the off-set power function fit at five specific liposome sizes. We used these values to calculate the average absolute density on either DOPC or POPC membranes for the five different liposome diameters and presented these in Fig. 1 E, along with the mean  $\pm$  SE from  $n_{\text{DOPC}} = 9$  and  $n_{\text{POPC}} = 8$  independent experiments (see Supporting Material).

For liposomes larger than 90 nm, we found a higher tN-Ras density on the DOPC, as compared to the POPC, system. However, for smaller liposomes ( $<90$  nm) the trend was reversed, resulting in a higher tN-Ras density on POPC liposomes. Thus, the increased selective recruitment by curvature quantified for the POPC system originated both from a decreased density on flat, and an increased density on curved, membranes compared to the DOPC system. This illustrates the complex interplay between membrane composition and curvature and how it is the combination of both properties that accounts for the absolute binding of lipidated proteins to membranes.

### Molecular field calculations reveal that composition-dependent variations in the lipid packing density modulate the curvature-selective recruitment ability

Next we used a molecular field theory, as we have shown in Larsen et al. (11), to determine the thermodynamic and structural characteristics of the lipid bilayers, to provide a mechanistic understanding of how the selective tN-Ras recruitment by membrane curvature was influenced by bilayer lipid shape. The theory explicitly incorporates the conformational energy and entropy of the acyl chains of the bilayer lipids and tN-Ras anchor molecules. Together with terms accounting for the lipid headgroups and the translational mobility of the lipids, these contributions collectively form a density functional that encompasses fluctuations over all possible states of the systems.

The equilibrium state of a given system is calculated through functional minimization with respect to the system's free variables, and is represented by the system's thermodynamic free energy (34,35). There is only one free parameter in the model. The relaxation ratio, which determines the amount of flip-flop between the leaflets as a function of curvature, is fit in the theory to match up with experimentally determined bending moduli for the lipid bilayers of interest in this article (Table S1). Our experimental data are then directly and quantitatively compared with the theoretical prediction of absorbed density; no further fitting is involved.

The resulting probability distributions are shown to have the same functional form for each chain in the hydrophobic region (here written with the explicit configuration dependence,  $\alpha_\delta$ , and curvature dependence,  $(c)$ ). The probability



of each chain being in a particular configuration within a membrane with a given curvature is

$$P_{\delta}(\alpha_{\delta}, \mathbf{c}) = \frac{1}{q_{\delta}(\mathbf{c})} \exp \left\{ -\beta \varepsilon(\alpha_{\delta}) - \int_{-l}^l \beta \pi(z, \mathbf{c}) v_{\delta}(z, \alpha_{\delta}) dz \right\}, \quad (1)$$

where  $\varepsilon(\alpha_{\delta})$  denotes the internal energy of the chains in configuration  $\alpha_{\delta}$ ;  $\pi(z, \mathbf{c})$  is the lateral pressure profile, determined self-consistently for each curved state of the bilayer; and  $v_{\delta}(z, \alpha_{\delta})$  is the contribution to the volume of the hydrophobic core at  $z$  (distance from the midplane of the bilayer) from the molecules in leaflet  $\delta$  (inner or outer leaflet), existing in configuration  $\alpha_{\delta}$ . The integration is performed over the entire hydrophobic region of the bilayer ( $-l \leq z \leq +l$ ). The value  $q_{\delta}(\mathbf{c})$  is the single molecule partition function (normalization of the probability), defined as

$$q_{\delta}(\mathbf{c}) = \sum_{\alpha_{\delta}} \exp \left\{ -\beta \varepsilon(\alpha_{\delta}) - \int_{-l}^l \beta \pi(z, \mathbf{c}) v_{\delta}(z, \alpha_{\delta}) dz \right\}. \quad (2)$$

When a bulk solution containing lipid anchors is in contact with a curved or planar lipid bilayer, thermodynamics requires that the chemical potential of the lipid anchors in the bulk solution,  $\mu_A^{\text{bulk}}$ , must be equal to the chemical potential of the anchors bound to the external leaf of the bilayer in contact with the solution,  $\mu_A^{\text{bulk}} = \mu_A(\mathbf{c}) = \mu_A(\mathbf{c} = 0)$ . The chemical potential of the lipid anchors within this theoretical framework is

$$\beta \mu_A(\mathbf{c}) = \ln(\rho_A(\mathbf{c})) - \ln(q_{\text{pal},E}(\mathbf{c})q_{\text{far},E}(\mathbf{c})), \quad (3)$$

where  $q_{\text{pal},E}(\mathbf{c})$  and  $q_{\text{far},E}(\mathbf{c})$  are the partition functions of the palmitoyl and farnesyl chain-anchors of tN-Ras, respectively. Because the lipid anchors are not explicitly present during the functional minimization that returns the lateral pressure fields of the curved lipid bilayers, we use Widom's potential distribution theorem (34,36) to obtain the chemical potential of the membrane-bound lipid anchors.

From this method, we may calculate the bound density of the lipid anchors in a curved bilayer, relative to that of the planar bilayer, in terms of the corresponding ratio of their partition functions:

$$\frac{\rho_A(\mathbf{c})}{\rho_A(\mathbf{c} = 0)} = \frac{q_{\text{pal},E}(\mathbf{c})q_{\text{far},E}(\mathbf{c})}{q_{\text{pal},E}(\mathbf{c} = 0)q_{\text{far},E}(\mathbf{c} = 0)}. \quad (4)$$

The molecular model explicitly treats the packing interactions in the hydrophobic fatty-acid chain region of the

bilayer. Whereas previous work with this molecular theory has included additional interactions including both the electrostatics of the headgroups (37) and attractive Maier-Saupe interactions to properly model the liquid-disorder/liquid-order phase transition (11), we decided to use the minimum required physics to capture the experimental observations. For example, note that there are systems where the additional complexity of attractive interactions is needed when studying curvature sensing in lipid bilayers in the liquid-order phase. It was recently shown that curvature effects are highly nonadditive in the liquid-order phase using simulation (38). We have recently published a similar finding when comparing experimental observations to theoretical methods that used the Maier-Saupe attractive interaction to study curvature sensing of tN-Ras binding to liquid-disorder and liquid-order phases (11). In this study, the lipid bilayers are all in the liquid-disorder phase, so the model did not include any additional attractive interactions. For more details, see [Supporting Material \(11,34,36\)](#). This theoretical approach allowed us to determine the structure and thermodynamics of various lipid systems to elucidate differences in the exact molecular structural organization of the membrane lipids when curving the bilayer and how this subsequently affected the localization of tN-Ras.

The theoretically calculated tN-Ras recruitment (*black markers* in [Fig. 1, C and D](#)) displayed a relative good agreement with the experimental data and recapitulated the more potent selective recruitment by membrane curvature for the POPC versus the DOPC system. Both theoretical (34,35,39) and experimental (11,40,41) studies have shown that protein partitioning to membranes depends explicitly on the lipid packing density, expressed in the molecular field theory as the area per lipid and the lateral membrane pressure.

We calculated very similar relative increases in the area per lipid when curving DOPC and POPC membranes to a diameter of 50 nm (8 and 7%, respectively) ([Table 1](#)). This suggests that membrane composition-dependent variations in the area per lipid are not driving the observed differences in the selective recruitment by membrane curvature,

**TABLE 1** Summary of Data from Molecular Field Theory Calculations

|        | Area per Lipid<br>(nm <sup>2</sup> /Molecule) |       |          | Lateral Pressure<br>(pN/nm <sup>2</sup> ) |       |            | R Value |
|--------|-----------------------------------------------|-------|----------|-------------------------------------------|-------|------------|---------|
|        | Planar                                        | 50 nm | % Change | Planar                                    | 50 nm | $\Delta P$ |         |
| DOPC   | 0.695                                         | 0.741 | 6.6      | 480                                       | 404   | 76         | 8.9     |
| POPC   | 0.672                                         | 0.727 | 8.2      | 517                                       | 367   | 150        | 36.8    |
| 0% PE  | 0.695                                         | 0.741 | 6.6      | 480                                       | 404   | 76         | 8.9     |
| 25% PE | 0.688                                         | 0.732 | 6.4      | 456                                       | 396   | 60         | 7.7     |
| 50% PE | 0.681                                         | 0.725 | 6.5      | 432                                       | 383   | 48         | 6.5     |
| DMPC   | 0.621                                         | 0.661 | 6.4      | 442                                       | 334   | 108        | 17.7    |
| DLPC   | 0.627                                         | 0.671 | 7.1      | 458                                       | 296   | 162        | 28.3    |

in agreement with previous studies on amphipathic helix insertion (42). Our calculations additionally reveal that curving membranes distorts the transbilayer symmetry of the lateral pressure profile, increasing the pressure in the inner leaflet and relieving the pressure in the outer leaflet (Fig. 2 A). Comparing the curvature-mediated relief in the lateral pressure of the outer leaflet ( $\Delta P$ , shaded area in Fig. 2 A) revealed a 2.0-fold higher  $\Delta P$  for the POPC system as compared to the DOPC system (Fig. 2 B; Table 1). Thus, we propose that the larger curvature-dependent decrease in the lateral pressure of the outer leaflet observed for POPC could drive the more potent selective recruitment by membrane curvature quantified for the POPC-versus-DOPC system.

To further elucidate the importance of the lateral pressure in governing the absolute tN-Ras membrane density, we compared the integrated lateral pressures between the outer leaflets of DOPC and POPC membranes in both planar and curved geometries (Fig. 2 C; Table 1). Intuitively we would predict that a higher integrated lateral pressure would increase the work of insertion and thus reduce tN-Ras binding. We calculated a higher integrated lateral pressure for planar POPC than DOPC (Fig. 2 C, pink), corresponding to augmented tN-Ras binding in planar DOPC membranes, in complete agreement with the experimental data. In contrast, for highly curved membranes we found the highest integrated lateral pressure in the DOPC membranes (Fig. 2 C, orange), again corroborating our experimental finding of the highest tN-Ras binding on curved POPC membranes. The nontrivial correlation between the curvature-dependent absolute binding densities of tN-Ras and compositionally mediated variations in the lateral pressure

profile in the membrane's external leaf, further support compositional and curvature-mediated variation of the lateral pressure as an underlying mechanism determining lipidated protein recruitment.

### Lipid headgroup size modulates tN-Ras binding and selective recruitment by membrane curvature

To further elucidate the mechanistic role of lipid shape-dependent variations in the curvature-mediated relief in lateral pressure, we modulated another lipid shape parameter, namely the lipid headgroup size. We employed DOPE lipids, which display a more pronounced inverted cone shape due to their small headgroup volume as compared to other phospholipids, e.g., DOPC lipids (32,43) (Fig. 1 B). We prepared liposomes from lipid mixtures containing DOPC and increasing DOPE concentrations (0, 25, or 50 mol % DOPE) and quantified the selective recruitment of tN-Ras on all lipid formulations.  $R$  values decreased for higher mol % of DOPE, ranging from  $R = 7.4 \pm 0.4$ ,  $R = 6.4 \pm 1.7$  to  $R = 5.1 \pm 0.2$ , respectively, for 0, 25, and 50 mol % DOPE (Fig. 3, A–C; Fig. S3). This constitutes a small, yet significant, reduction in the selective recruitment by membrane curvature of tN-Ras when increasing the DOPE content.

Absolute tN-Ras density data on liposomes of different curvatures quantified an  $\sim 88\%$  increase in the density for a 400-nm liposome when increasing the DOPE content from 0 to 50 mol %, but a nonsignificant increase in density on smaller 40-nm liposomes for the same DOPE range (Fig. 3 D). This demonstrates that the reduced  $R$  values for higher DOPE concentrations originate from

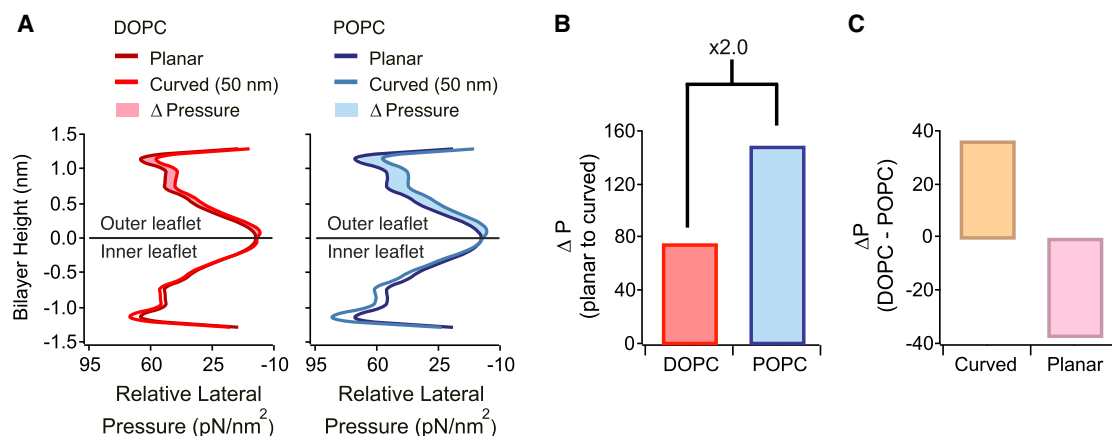

FIGURE 2 Molecular field theory calculations reveal a greater curvature-mediated relief in lateral pressure for POPC versus DOPC. (A) Given here are theoretically calculated relative lateral pressure profiles along the bilayer normal for the hydrophobic region of (left, red) DOPC membranes or (right, blue) POPC membranes. The top part represents the outer monolayer (outer leaflet), the bottom represents the inner monolayer (inner leaflet) of the membrane, and the relative lateral pressure profile is depicted for either planar (dark line) or curved (pale line, 50 nm diameter liposome) membranes. The curvature-dependent relief in the relative lateral pressure of the outer monolayer,  $\Delta P$ , is calculated as the total area between the curves (shaded area). (B) Given here is quantification of  $\Delta P$  imposed by membrane curvature (planar to 50 nm) for either DOPC (red) or POPC (blue). (C) Given here is quantification of the compositional dependent change in the total integrated lateral pressure as compared for curved (50 nm, orange) or planar (pink) DOPC and POPC membranes.

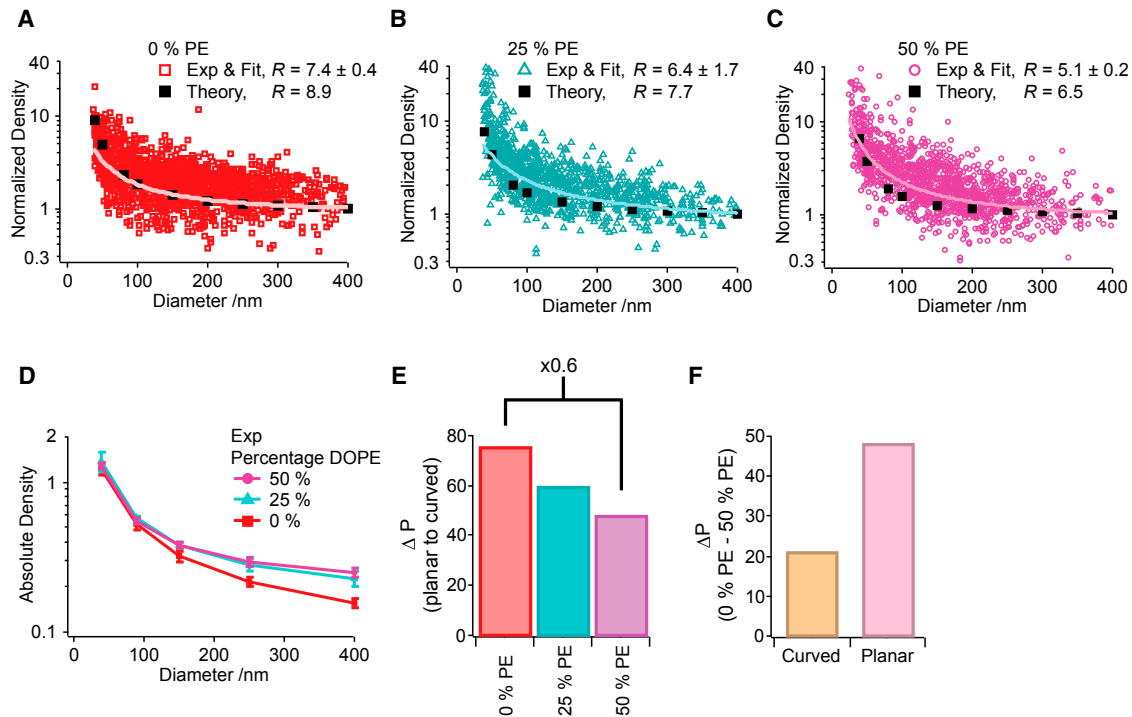

FIGURE 3 Introducing lipids with reduced headgroup size increases the absolute tN-Ras binding and decreases recruitment by membrane curvature. Given here is the normalized tN-Ras density and experimental fit as a function of liposome diameter for liposomes prepared from DOPC lipids and containing 0% PE (A), 25% (B), or 50% PE (C) and the molecular field theory calculations depicting the equilibrium binding concentrations of tN-Ras on the three systems.  $R$  is reported as the average mean  $\pm$  SE of  $n_{0\% \text{ PE}} = 9$ ,  $n_{25\% \text{ PE}} = 3$ , and  $n_{50\% \text{ PE}} = 6$  independent experiments. (D) Shown here is the average absolute tN-Ras density on either 0% PE (red), 25% PE (turquoise), or 50% PE (purple) membranes, calculated for five liposome diameters. (E) Shown here is the quantification of  $\Delta P$  imposed by membrane curvature for either 0% PE (red), 25% PE (turquoise), or 50% PE (purple) membranes of 50 nm in diameter. (F) Shown here is the quantification of the compositional dependent change in the total integrated lateral pressure as compared for curved (50 nm, orange) or planar (pink) 0 and 50% PE membranes.

a DOPE-dependent increase in tN-Ras density on large liposomes.

The molecular field theory calculations showed a relatively good agreement with the experimental data and recapitulated the trend of decreasing  $R$  values for higher DOPE concentrations. Again, the difference in the curvature-mediated change in the area per lipid was found to be minimal (6.6 and 6.5% for 0 and 50% PE, respectively) (Table 1). In contrast, we calculated a 37% decrease in the curvature-dependent relief in the lateral pressure for increasing DOPE concentration (from 0 to 50% PE), again suggesting this to be a mechanism for the quantified reduction in the curvature-sensitivity of tN-Ras (Fig. 3 E; Tables 1 and S3).

We also calculated a notably larger reduction in the integrated lateral pressure between 0 and 50% PE in planar membranes than in curved membranes (Fig. 3 F; Table 1). This corroborated the experimental data demonstrating a larger increase in the tN-Ras binding density with rising PE concentration on the planar versus curved membrane systems. Overall, the experimental data and theoretical calculations further validate lipid shape-dependent variations in the curvature-mediated relief in lateral pressure as a mo-

lecular mechanism underlying differences in the selective membrane recruitment of lipidated proteins.

### Decreasing lipid length increases the selective recruitment by membrane curvature

Varying the number of acyl groups, hereby affecting lipid length and membrane thickness, is the only remaining basic approach to changing lipid shape, a modulation that, to our knowledge, has yet to be examined for its potential role in regulating curvature-dependent protein recruitment (Fig. 1 B). We analyzed a relatively thicker membrane system, produced from DMPC lipids (diC<sub>14</sub>,  $3.67 \pm 0.07$  nm) (44), and compared it to a thinner system produced from the short-tailed DLPC lipids (diC<sub>12</sub>,  $3.26 \pm 0.07$  nm) (44). Although all other experiments were performed at 22°C, the comparison of DMPC and DLPC was performed at 30°C, where both lipid systems were in the fluid (liquid-disordered) phase and have previously been shown to display an  $\sim 12\%$  difference in bilayer thickness (44).

We quantified  $R = 15.4 \pm 2.9$  and  $R = 31.0 \pm 3.7$  for the DMPC and the DLPC systems, respectively (Fig. 4, A and B; Fig. S3). Hence, decreasing membrane thickness caused a

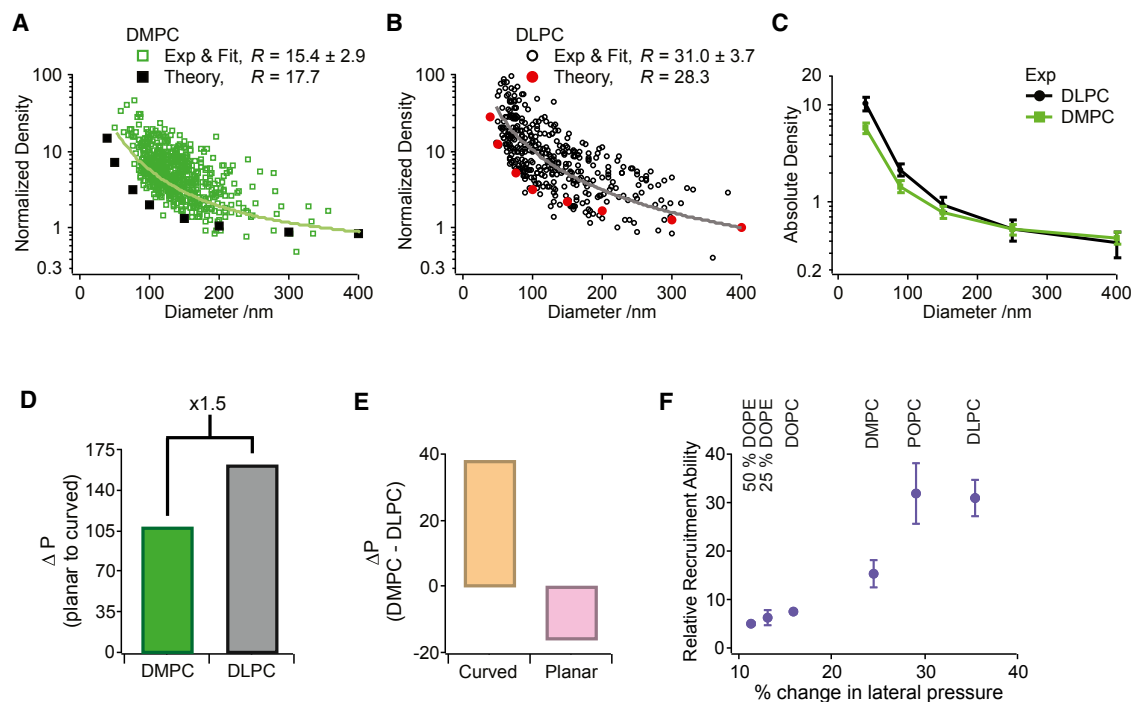

**FIGURE 4** Thinner membranes show increased recruitment of tN-Ras by membrane curvature. Given here is the normalized tN-Ras density as a function of liposome diameter for liposomes prepared from longer DMPC lipids (**A**) or shorter DLPC lipids (**B**) and the molecular field theory calculations depicting the equilibrium binding concentrations of tN-Ras on the two systems.  $R$  is reported as the average mean  $\pm$  SE of  $n_{\text{DMPC}} = 7$  and  $n_{\text{DLPC}} = 6$  independent experiments. (**C**) Shown here is the average absolute tN-Ras density on either DLPC (black) or DMPC (green), calculated for five liposome diameters. (**D**) Given here is the quantification of  $\Delta P$  imposed by membrane curvature for either DMPC (green) or DLPC (black) membranes of 50 nm in diameter. (**E**) Given here is the quantification of the compositional-dependent change in the total integrated lateral pressure as compared for curved (50 nm, orange) or planar (pink) DLPC and DMPC membranes. (**F**) Shown here are experimentally determined  $R$  values versus the theoretically calculated curvature-dependent % change in the lateral pressure.

twofold increase in the selective recruitment of tN-Ras by membrane curvature. The average absolute tN-Ras density plots demonstrated similar densities of tN-Ras on larger DMPC and DLPC liposomes, but significantly higher densities on highly curved DLPC versus DMPC liposomes, indicating differential binding on curved membranes to be the origin of the increased  $R$  value found for the DLPC system (Fig. 4 C).

Molecular field calculations found a thickness difference of  $\sim 11\%$ , matching well the experimentally determined value of 12% (44), and fully captured the trend of increased selective tN-Ras recruitment for the DLPC as compared to the DMPC system, albeit while following the lower part of the experimental data (Fig. 4, A and B; Tables 1 and S1). The calculations quantified a 1.5-fold increase in  $\Delta P$  for the DLPC versus the DMPC system and essentially no difference for the area per lipid (7 and 6%, respectively) (Figs. 4 D and S4; Table 1). We also calculated a markedly larger difference between the integrated lateral pressure of curved DMPC and DLPC membranes than in planar DMPC and DLPC membranes, all of which mirrors the experimental observations.

Here we show that changing lipid length can modulate both membrane binding and the selective recruitment by

membrane curvature of membrane-anchored proteins. Finally, comparing all the experimentally collected  $R$  values versus the theoretically calculated curvature-dependent % change in lateral pressure displays an almost linear dependency (Figs. 4 F and S5). This very strong correlation further strengthens curvature-mediated relief in the lateral pressure as a molecular mechanism governing the curvature-sensitivity of lipidated proteins, and that any variation in lipid shape and membrane curvature synergistically tune the recruitment of such protein.

## DISCUSSION

Membrane-based sorting of lipidated proteins in general, and Ras proteins in particular, have traditionally been discussed in the context of partitioning between ordered membrane domains, previously referred to as “raft domains” (5,45–47). Only recently was membrane curvature introduced as a generic regulator of lipidated protein localization (12) and suggested to work in synergy with ordered membrane domains to facilitate preferential tN-Ras up-concentration (11). This illustrates how the unique composition of complex lipid mixtures, which modulates collective membrane properties such as phase state, could synergize



with membrane curvature in regulating the binding of lipidated proteins. Here we revealed how modulating individual properties affecting lipid shape also affect the curvature-selective recruitment of lipidated proteins and we have proposed a molecular mechanism.

Organelle-specific variations in lipid composition are tightly controlled and even small perturbations can elicit stress responses, triggering cell death (9). The Golgi represents the main sorting station for saturated lipids. Here, trafficking vesicles are believed to selectively transport more saturated lipid species to the plasma membrane, maintaining a gradient of increasing degree of acyl chain saturation along the secretory pathway (48,49). These vesicle carriers have additionally been proposed to constitute the vesicular-based transport mechanism responsible for correct Ras localization to its main signaling compartment, the plasma membrane (6,50,51). Our findings suggest that the combination of high membrane curvature and increased levels of saturated lipids might constitute a potent molecular cue driving selective Ras localization to such trafficking vesicles, hereby efficiently delivering Ras to the plasma membrane.

Lipid length, and consequently membrane thickness, also differs between organelles, showing an  $\sim 13\%$  increase from the ER to the plasma membrane (52). Comparable to this, we modulated the lipid length in our model system by two acyl groups with a subsequent  $\sim 12\%$  change in thickness (44). Traditionally, such differences in membrane thickness have been proposed to regulate the sorting of integral membrane proteins based on hydrophobic mismatch between the transmembrane segment and the bilayer (53). However, the regulatory role of membrane thickness has, to our knowledge, not yet been considered in relation to the selective recruitment of membrane-anchored proteins by membrane curvature.

Here we showed that reducing lipid length increased the selective recruitment of tN-Ras by membrane curvature. This suggests a stronger selective recruitment to vesicular carriers with thinner membranes budding from the ER or Golgi as compared to carriers with thicker membrane budding from the plasma membrane. Such a mechanism might infer a selective driving force for localizing N-Ras on anterograde vesicular carriers, moving N-Ras to and retaining it at the plasma membrane where it primarily elicits its function (54).

Our finding that modulating acyl chain saturation or headgroup size affects the selective recruitment by membrane curvature of tN-Ras, is in line with previous observations for proteins anchored through shallow insertion of amphipathic helices (40,42,55,56). This suggests that the interplay among lipid saturation state, headgroup size, and curvature might be a generic mechanism for regulating the localization of proteins anchored through hydrophobic insertion.

Previously, the biophysical mechanism relating how composition and curvature synergize to regulate selective

protein recruitment has predominantly been discussed in the context of interfacial lipid packing defects (40,42,57,58). This concept has been instrumental in understanding how composition and curvature regulate the selective recruitment of proteins anchored through shallowly inserted amphipathic helices. However, for lipidated proteins, which insert deeper into the outer membrane monolayer, a continuum model based on lipid packing density variations controlled by composition and curvature may be more appropriate (34,35). Further evidence supporting this comes from coarse-grained MD simulation work describing the recruitment of various Ras peptides to the interface between phase-separated membranes (7,59–61). Here a direct link was found between increased Ras clustering at the domain interface and changes in various structural membrane properties, including the lateral pressure profile, subsequently leading to introduction of membrane curvature. This work suggests an intimate relationship between how Ras peptides can be recruited by membrane curvature and how the recruitment can lead to curvature stabilization, potentially working as a positive feedback loop, driving Ras protein recruitment.

The theoretical calculations presented in this work suggest that, in mechanistic terms, the curvature- and composition-dependent relief in the lateral pressure of the outer leaflet will lead to a reduction in the work of insertion for tN-Ras, essentially driving the increased recruitment. An additional important corollary from the theoretical calculations is that any extrinsic parameters affecting membrane lateral pressure will lead to altered tN-Ras recruitment. This could be the binding and subsequent scaffolding of other peripheral proteins, the lateral segregation of lipids or transmembrane proteins, or interactions between the membrane and the cell cytoskeleton. All would work in synergy with composition and curvature and provide the cell with additional means to locally tune the density of lipidated proteins.

We have previously proposed curvature-mediated changes in lateral pressure as the molecular mechanism explaining how different complex lipid mixtures, regulating collective membrane properties like phase state, influence the selective recruitment by membrane curvature (11). Here we strengthened this hypothesis, demonstrating that modifying individual lipid properties, like degree of acyl chain saturation, headgroup area, or lipid length, will also lead to variations in the curvature-mediated relief in lateral pressure in the absence of changes in phase state.

## CONCLUSIONS

We show that modulating the bilayer lipid shape can affect the selective recruitment by membrane curvature of the N-Ras lipid anchors. Molecular field theory calculations suggest lipid shape-dependent variation in the curvature-mediated relief in lateral pressure as an underlying

biophysical parameter regulating the selective recruitment by membrane curvature. In cells, multiple factors contribute to the selective organization of lipidated proteins. Here, we propose that the compositional heterogeneity between compartments could allow the cell to promote or impede the curvature-selective recruitment of lipidated proteins, and thereby locally fine-tune protein localization.

## SUPPORTING MATERIAL

Supporting Materials and Methods, one table, and five figures are available at [http://www.biophysj.org/biophysj/supplemental/S0006-3495\(17\)30701-4](http://www.biophysj.org/biophysj/supplemental/S0006-3495(17)30701-4).

## AUTHOR CONTRIBUTIONS

J.B.L., N.S.H., and D.S. designed research. J.B.L. performed research. C.K. and M.J.U. performed theoretical modeling. S.L.P. and K.J.J. contributed new reagents/analytic tools. J.B.L. and N.S.H. analyzed data. J.B.L., N.S.H., C.K., M.J.U., and D.S. wrote the paper. All authors discussed the results and commented on the manuscript at all stages.

## ACKNOWLEDGMENTS

This work was supported by the Lundbeck Foundation Center for Biomembranes in Nanomedicine, the Danish Councils for Independent and Strategic Research (1311-00002B), and the University of Copenhagen Programs of Excellence “Single Molecule Nanoscience”, “BioScaRT”, and “SYNBIO”. M.J.U. acknowledges support from the National Institutes of Health under grant P20GM103499.

## SUPPORTING CITATIONS

References (62–78) appear in the Supporting Material.

## REFERENCES

- Tate, E. W., K. A. Kalesh, ..., E. Thion. 2015. Global profiling of protein lipidation using chemical proteomic technologies. *Curr. Opin. Chem. Biol.* 24:48–57.
- Groves, J. T., and J. Kuriyan. 2010. Molecular mechanisms in signal transduction at the membrane. *Nat. Struct. Mol. Biol.* 17:659–665.
- Rocks, O., A. Peyker, ..., P. I. H. Bastiaens. 2005. An acylation cycle regulates localization and activity of palmitoylated Ras isoforms. *Science*. 307:1746–1752.
- Resh, M. D. 2012. Targeting protein lipidation in disease. *Trends Mol. Med.* 18:206–214.
- Prior, I. A., A. Harding, ..., J. F. Hancock. 2001. GTP-dependent segregation of H-ras from lipid rafts is required for biological activity. *Nat. Cell Biol.* 3:368–375.
- Simons, K., and M. J. Gerl. 2010. Revitalizing membrane rafts: new tools and insights. *Nat. Rev. Mol. Cell Biol.* 11:688–699.
- Janosi, L., Z. Li, ..., A. A. Gorfe. 2012. Organization, dynamics, and segregation of Ras nanoclusters in membrane domains. *Proc. Natl. Acad. Sci. USA*. 109:8097–8102.
- van Meer, G., D. R. Voelker, and G. W. Feigenson. 2008. Membrane lipids: where they are and how they behave. *Nat. Rev. Mol. Cell Biol.* 9:112–124.
- Holthuis, J. C. M., and A. K. Menon. 2014. Lipid landscapes and pipelines in membrane homeostasis. *Nature*. 510:48–57.
- Bigay, J., and B. Antony. 2012. Curvature, lipid packing, and electrostatics of membrane organelles: defining cellular territories in determining specificity. *Dev. Cell*. 23:886–895.
- Larsen, J. B., M. B. Jensen, ..., D. Stamou. 2015. Membrane curvature enables N-ras lipid anchor sorting to liquid-ordered membrane phases. *Nat. Chem. Biol.* 11:192–194.
- Hatzakis, N. S., V. K. Bhatia, ..., D. Stamou. 2009. How curved membranes recruit amphipathic helices and protein anchoring motifs. *Nat. Chem. Biol.* 5:835–841.
- Shibata, Y., J. Hu, ..., T. A. Rapoport. 2009. Mechanisms shaping the membranes of cellular organelles. *Annu. Rev. Cell Dev. Biol.* 25:329–354.
- Lippincott-Schwartz, J., and R. D. Phair. 2010. Lipids and cholesterol as regulators of traffic in the endomembrane system. *Annu. Rev. Biophys.* 39:559–578.
- Prior, I. A., and J. F. Hancock. 2012. Ras trafficking, localization and compartmentalized signalling. *Semin. Cell Dev. Biol.* 23:145–153.
- Prior, I. A., P. D. Lewis, and C. Mattos. 2012. A comprehensive survey of Ras mutations in cancer. *Cancer Res.* 72:2457–2467.
- Bhatia, V. K., K. L. Madsen, ..., D. Stamou. 2009. Amphipathic motifs in BAR domains are essential for membrane curvature sensing. *EMBO J.* 28:3303–3314.
- Larsen, J., N. S. Hatzakis, and D. Stamou. 2011. Observation of inhomogeneity in the lipid composition of individual nanoscale liposomes. *J. Am. Chem. Soc.* 133:10685–10687.
- Elizondo, E., J. Larsen, ..., N. Ventosa. 2012. Influence of the preparation route on the supramolecular organization of lipids in a vesicular system. *J. Am. Chem. Soc.* 134:1918–1921.
- Kunding, A. H., M. W. Mortensen, ..., D. Stamou. 2008. A fluorescence-based technique to construct size distributions from single-object measurements: application to the extrusion of lipid vesicles. *Biophys. J.* 95:1176–1188.
- Bhatia, V. K., N. S. Hatzakis, and D. Stamou. 2010. A unifying mechanism accounts for sensing of membrane curvature by BAR domains, amphipathic helices and membrane-anchored proteins. *Semin. Cell Dev. Biol.* 21:381–390.
- Bendix, P. M., M. S. Pedersen, and D. Stamou. 2009. Quantification of nano-scale intermembrane contact areas by using fluorescence resonance energy transfer. *Proc. Natl. Acad. Sci. USA*. 106:12341–12346.
- Hughes, L. D., R. J. Rawle, and S. G. Boxer. 2014. Choose your label wisely: water-soluble fluorophores often interact with lipid bilayers. *PLoS One*. 9:e87649.
- Antony, B. 2011. Mechanisms of membrane curvature sensing. *Annu. Rev. Biochem.* 80:101–123.
- Cooke, I. R., and M. Deserno. 2006. Coupling between lipid shape and membrane curvature. *Biophys. J.* 91:487–495.
- Kamal, M. M., D. Mills, ..., J. Howard. 2009. Measurement of the membrane curvature preference of phospholipids reveals only weak coupling between lipid shape and leaflet curvature. *Proc. Natl. Acad. Sci. USA*. 106:22245–22250.
- Callan-Jones, A., B. Sorre, and P. Bassereau. 2011. Curvature-driven lipid sorting in biomembranes. *Cold Spring Harb. Perspect. Biol.* 3:a004648.
- Tian, A., and T. Baumgart. 2009. Sorting of lipids and proteins in membrane curvature gradients. *Biophys. J.* 96:2676–2688.
- Sorre, B., A. Callan-Jones, ..., P. Bassereau. 2009. Curvature-driven lipid sorting needs proximity to a demixing point and is aided by proteins. *Proc. Natl. Acad. Sci. USA*. 106:5622–5626.
- Hsieh, W. T., C. J. Hsu, ..., T. Baumgart. 2012. Curvature sorting of peripheral proteins on solid-supported wavy membranes. *Langmuir*. 28:12838–12843.
- Parthasarathy, R., C. H. Yu, and J. T. Groves. 2006. Curvature-modulated phase separation in lipid bilayer membranes. *Langmuir*. 22:5095–5099.
- Israelachvili, J. 1991. *Intermolecular and Surface Forces*, 3rd Ed. Elsevier, London, UK.

33. Strandberg, E., D. Tiltak, ..., A. S. Ulrich. 2012. Lipid shape is a key factor for membrane interactions of amphipathic helical peptides. *Biochim. Biophys. Acta.* 1818:1764–1776.
34. Uline, M. J., G. S. Longo, ..., I. Szleifer. 2010. Calculating partition coefficients of chain anchors in liquid-ordered and liquid-disordered phases. *Biophys. J.* 98:1883–1892.
35. Uline, M. J., and I. Szleifer. 2013. Mode specific elastic constants for the gel, liquid-ordered, and liquid-disordered phases of DPPC/DOPC/cholesterol model lipid bilayers. *Faraday Discuss.* 161:177–191, discussion 273–303.
36. Widom, B. 1982. Potential-distribution theory and the statistical mechanics of fluids. *J. Phys. Chem.* 86:869–872.
37. Grillo, D., M. O. de la Cruz, and I. Szleifer. 2011. Theoretical studies of the phase behavior of DPPC bilayers in the presence of macroions. *Soft Matter.* 7:4672–4679.
38. Sodt, A. J., R. M. Venable, ..., R. W. Pastor. 2016. Nonadditive compositional curvature energetics of lipid bilayers. *Phys. Rev. Lett.* 117:138104.
39. Campelo, F., and M. M. Kozlov. 2014. Sensing membrane stresses by protein insertions. *PLOS Comput. Biol.* 10:e1003556.
40. Pinot, M., S. Vanni, ..., H. Barelli. 2014. Lipid cell biology. Polyunsaturated phospholipids facilitate membrane deformation and fission by endocytic proteins. *Science.* 345:693–697.
41. Bigay, J., P. Gounon, ..., B. Antonny. 2003. Lipid packing sensed by ArfGAP1 couples COPI coat disassembly to membrane bilayer curvature. *Nature.* 426:563–566.
42. Vanni, S., H. Hirose, ..., R. Gautier. 2014. A sub-nanometre view of how membrane curvature and composition modulate lipid packing and protein recruitment. *Nat. Commun.* 5:4916.
43. Frolov, V. A., A. V. Shnyrova, and J. Zimmerberg. 2011. Lipid polymorphisms and membrane shape. *Cold Spring Harbor Perspect. Biol.* 3:a004747.
44. Kucerka, N., M.-P. Nieh, and J. Katsaras. 2011. Fluid phase lipid areas and bilayer thicknesses of commonly used phosphatidylcholines as a function of temperature. *Biochim Biophys Acta.* 1808:2761–2771.
45. Resh, M. D. 2006. Trafficking and signaling by fatty-acylated and prenylated proteins. *Nat. Chem. Biol.* 2:584–590.
46. Lingwood, D., and K. Simons. 2010. Lipid rafts as a membrane-organizing principle. *Science.* 327:46–50.
47. Veatch, S. L., and S. L. Keller. 2005. Seeing spots: complex phase behavior in simple membranes. *Biochim Biophys Acta.* 1746:172–185.
48. van Meer, G., and A. I. P. M. de Kroon. 2011. Lipid map of the mammalian cell. *J. Cell Sci.* 124:5–8.
49. Sprong, H., P. van der Sluijs, and G. van Meer. 2001. How proteins move lipids and lipids move proteins. *Nat. Rev. Mol. Cell Biol.* 2:504–513.
50. Apolloni, A., I. A. Prior, ..., J. F. Hancock. 2000. H-ras but not K-ras traffics to the plasma membrane through the exocytic pathway. *Mol. Cell. Biol.* 20:2475–2487.
51. Plowman, S. J., and J. F. Hancock. 2005. Ras signaling from plasma membrane and endomembrane microdomains. *Biochim. Biophys. Acta.* 1746:274–283.
52. Mitra, K., I. Ubarretxena-Belandia, ..., D. M. Engelman. 2004. Modulation of the bilayer thickness of exocytic pathway membranes by membrane proteins rather than cholesterol. *Proc. Natl. Acad. Sci. USA.* 101:4083–4088.
53. Andersen, O. S., and R. E. Koeppe, 2nd. 2007. Bilayer thickness and membrane protein function: an energetic perspective. *Annu. Rev. Biophys. Biomol. Struct.* 36:107–130.
54. Hancock, J. F. 2003. Ras proteins: different signals from different locations. *Nat. Rev. Mol. Cell Biol.* 4:373–384.
55. Bigay, J., J. F. Casella, ..., B. Antonny. 2005. ArfGAP1 responds to membrane curvature through the folding of a lipid packing sensor motif. *EMBO J.* 24:2244–2253.
56. Mesmin, B., G. Drin, ..., B. Antonny. 2007. Two lipid-packing sensor motifs contribute to the sensitivity of ArfGAP1 to membrane curvature. *Biochemistry.* 46:1779–1790.
57. Vamparys, L., R. Gautier, ..., P. F. J. Fuchs. 2013. Conical lipids in flat bilayers induce packing defects similar to that induced by positive curvature. *Biophys. J.* 104:585–593.
58. Cui, H., E. Lyman, and G. A. Voth. 2011. Mechanism of membrane curvature sensing by amphipathic helix containing proteins. *Biophys. J.* 100:1271–1279.
59. Li, H., and A. A. Gorfe. 2014. Membrane remodeling by surface-bound protein aggregates: insights from coarse-grained molecular dynamics simulation. *J. Phys. Chem. Lett.* 5:1457–1462.
60. Li, Z., and A. A. Gorfe. 2013. Deformation of a two-domain lipid bilayer due to asymmetric insertion of lipid-modified Ras peptides. *Soft Matter.* 9:11249–11256.
61. Li, Z., and A. A. Gorfe. 2014. Modulation of a small two-domain lipid vesicle by inactants. *J. Phys. Chem. B.* 118:9028–9036.
62. McIntosh, T. J., and S. A. Simon. 2006. Roles of bilayer material properties in function and distribution of membrane proteins. *Annu. Rev. Biophys. Biomol. Struct.* 35:177–198.
63. Kucerka, N., J. Pencer, ..., J. Katsaras. 2007. Curvature effect on the structure of phospholipid bilayers. *Langmuir.* 23:1292–1299.
64. Kollmitzer, B., P. Heftberger, ..., G. Pabst. 2013. Monolayer spontaneous curvature of raft-forming membrane lipids. *Soft Matter.* 9:10877–10884.
65. Kooijman, E. E., V. Chupin, ..., P. R. Rand. 2005. Spontaneous curvature of phosphatidic acid and lysophosphatidic acid. *Biochemistry.* 44:2097–2102.
66. Zimmerberg, J., and M. M. Kozlov. 2006. How proteins produce cellular membrane curvature. *Nat. Rev. Mol. Cell Biol.* 7:9–19.
67. Orsi, M., J. Michel, and J. W. Essex. 2010. Coarse-grain modelling of DMPC and DOPC lipid bilayers. *J. Phys. Condens. Matter.* 22:155106.
68. Marsh, D. 2007. Lateral pressure profile, spontaneous curvature frustration, and the incorporation and conformation of proteins in membranes. *Biophys. J.* 93:3884–3899.
69. Poger, D., and A. E. Mark. 2010. On the validation of molecular dynamics simulations of saturated and cis-monounsaturated phosphatidylcholine lipid bilayers: a comparison with experiment. *J. Chem. Theory Comput.* 6:325–336.
70. Flory, P. J. 1969. *Statistical Mechanics of Chain Molecules.* Wiley-Interscience, New York, NY.
71. Rawicz, W., K. C. Olbrich, ..., E. Evans. 2000. Effect of chain length and unsaturation on elasticity of lipid bilayers. *Biophys. J.* 79:328–339.
72. Arriaga, L. R., I. López-Montero, ..., T. Hellweg. 2009. Stiffening effect of cholesterol on disordered lipid phases: a combined neutron spin echo + dynamic light scattering analysis of the bending elasticity of large unilamellar vesicles. *Biophys. J.* 96:3629–3637.
73. Kucerka, N., Y. Liu, ..., J. F. Nagle. 2005. Structure of fully hydrated fluid phase DMPC and DLPC lipid bilayers using x-ray scattering from oriented multilamellar arrays and from unilamellar vesicles. *Biophys. J.* 88:2626A–2637A.
74. Dimova, R. 2014. Recent developments in the field of bending rigidity measurements on membranes. *Adv. Colloid Interface Sci.* 208:225–234.
75. Gullingsrud, J., and K. Schulten. 2004. Lipid bilayer pressure profiles and mechanosensitive channel gating. *Biophys. J.* 86:3496–3509.
76. Orsi, M., and J. W. Essex. 2013. Physical properties of mixed bilayers containing lamellar and nonlamellar lipids: insights from coarse-grain molecular dynamics simulations. *Faraday Discuss.* 161:249–272, discussion 273–303.
77. Rowlinson, J. S., and B. Widom. 1982. *Molecular Theory of Capillarity.* Dover Publications, New York, NY.
78. Peter, B. J., H. M. Kent, ..., H. T. McMahon. 2004. BAR domains as sensors of membrane curvature: the amphiphysin BAR structure. *Science.* 303:495–499.

**Biophysical Journal, Volume 113**

**Supplemental Information**

**Membrane Curvature and Lipid Composition Synergize To Regulate N-Ras Anchor Recruitment**

**Jannik B. Larsen, Celeste Kennard, Søren L. Pedersen, Knud J. Jensen, Mark J. Uline, Nikos S. Hatzakis, and Dimitrios Stamou**



## **Lipid compositions**

All components are given as molar percentage.

Lipid saturation study:

**POPC:** POPC:POPS:DOPE-biotin:DOPE-Atto655 (88.5:9.5:1:1)

**DOPC:** DOPC:DOPS:DOPE-biotin:DOPE-Atto655 (88.5:9.5:1:1)

DOPE study:

**0 % PE;** DOPC:DOPS:DOPE-biotin:DOPE-Atto655 (88.5:9.5:1:1)

**25 % PE;** DOPC:DOPS:DOPE:DOPE-biotin:DOPE-Atto655 (63.5:9.5:25:1:1)

**50 % PE** DOPC:DOPS:DOPE:DOPE-biotin:DOPE-Atto655 (38.5:9.5:50:1:1)

Lipid length study:

**DLPC:** DLPC:DLPS:DOPE-biotin:DOPE-Atto655 (88.5:9.5:1:1)

**DMPC:** DMPC:DMPS:DOPE-biotin:DOPE-Atto655 (88.5:9.5:1:1)

We systematically change the membrane composition of the employed liposomes to correlate changes in membrane properties to altered recruitment of tN-Ras by membrane curvature. In general, changing one membrane parameter might influence others (1); nonetheless, here we will relate our observations to the major physical parameter that we change, i.e. lipid chain saturation state (POPC versus DOPC), headgroup size (DOPE), or lipid length/membrane thickness (DLPC versus DMPC). Importantly, modulating membrane curvature has been reported not to change membrane thickness (2), an observation corroborated by the molecular field calculations showing insignificant changes in membrane thickness between planar and 50 nm in diameter spherical membranes (Table S1). Also, the lipid structures in Fig. 1 B are depicted taking into account the experimentally determined values for spontaneous curvature. However, to our knowledge, only the values for DOPC and DOPE have been quantified in much detail (3-6) and for the POPC system we only found a single study (3). For DLPC we were unable to find any information on the spontaneous curvature and for DMPC it was limited to estimated values, that has not been experimentally confirmed (7, 8), although the studies do corroborate the consensus of the field that DMPC and DLPC both have positive spontaneous curvatures (9).

|        | Thickness (nm) |       |          | Relaxation<br>Ratio | Calculated<br>Bending<br>Modulus ( $10^{-19}$ J) | Experimental<br>Bending<br>Modulus ( $10^{-19}$ J) | Spontaneous<br>Curvature<br>$\text{nm}^{-1}$ |
|--------|----------------|-------|----------|---------------------|--------------------------------------------------|----------------------------------------------------|----------------------------------------------|
|        | Planar         | 50 nm | % change |                     |                                                  |                                                    |                                              |
| DOPC   | 3.74           | 3.74  | 0.0      | 0.40                | 0.84                                             | $0.85 \pm 0.10$ (16)                               | $-(0.05 \text{ to } 0.11)$ (3-5)             |
| POPC   | 3.7            | 3.69  | 0.3      | 0.28                | 0.80                                             | $0.77 \pm 0.08$ (17)                               | $-0.022 \pm 0.01$ (5)                        |
| 0% PE  | 3.74           | 3.74  | 0.0      | 0.40                | 0.85                                             | DOPE                                               | $-(0.31 \text{ to } 0.35)$ (4-6)             |
| 25% PE | 3.74           | 3.74  | 0.0      | 0.40                | 0.85                                             |                                                    |                                              |
| 50% PE | 3.74           | 3.74  | 0.0      | 0.40                | 0.84                                             |                                                    |                                              |
| DMPC   | 3.44           | 3.43  | 0.3      | 0.35                | 0.71                                             | 0.69 (18)                                          | No exp value                                 |
| DLPC   | 3.07           | 3.06  | 0.3      | 0.24                | 0.69                                             | 0.55 (18)                                          | No exp value                                 |

**Table S1:** Summary of results from the molecular field theory calculations and relevant literature values.

**The concentration of DOPE-Atto655 is not biased in any curvature dependent manner**

Previously we have experimentally shown that significant curvature dependent lipid demixing based on lipid spontaneous curvature does not occur in the SLiC assay through experiments with premixed pairs of fluorophores (10, 11). We tested structurally similar fluorophores, like DiD and DiO, and detected a constant average intensity ratio value as function of liposome diameter (Fig. S1 A) (10, 11). Even more illustrative is the similar constant intensity ratio versus liposome diameter for a DPPE-Atto633 and Palmitoyl-Fluorescein ( $C_{16}$ -F) fluorophore pair, which have vastly different intrinsic spontaneous curvatures, demonstrating no significant lipid demixing in the SLiC assay (Fig. S1 B) (10, 11).

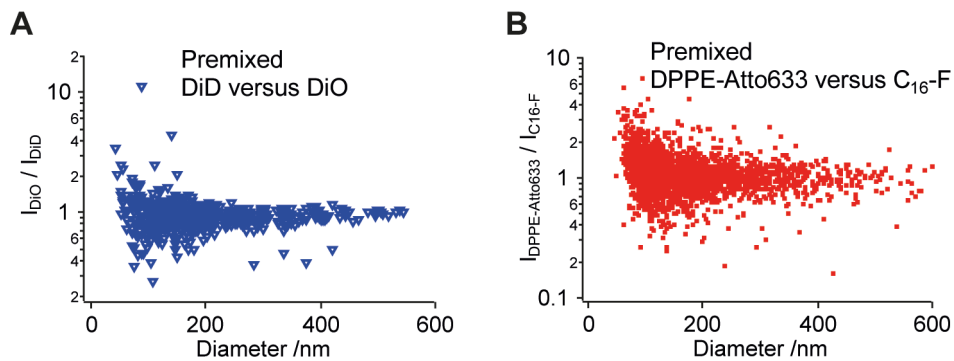

**Figure S1:** A) Intensity ratio of vesicles premixed with DiD and DiO versus vesicle diameter. B) Intensity ratio of vesicles premixed with DPPE-Atto633 and  $C_{16}$ -F versus vesicle diameter.

**Power function fitting to extract recruitment ability**

As previously described (12), we fitted the density versus liposome diameter data with an error weighted off-set power function to quantify the recruitment by membrane curvature:

$$D_{tN-Ras} = D_0 + \beta \cdot (Dia_{ves})^\alpha \quad (S1)$$

with  $D_{tN-Ras}$  being the peptide density,  $D_0$  being the offset peptide density value,  $Dia_{ves}$  as the liposome diameter, and  $\alpha$  and  $\beta$  representing fitting parameters. From the obtained fits we quantified the relative recruitment ratio ( $R$ ), defined as the increase in peptide density when reducing the curvature by a factor of 10 (Fig. S2 and S3).  $R$  was calculated as the ratio between the density on a 40 nm and a 400 nm in diameter liposome:

$$R = \frac{dens(40\text{ nm})}{dens(400\text{ nm})} = \frac{D_0 + \beta \cdot (40\text{ nm})^\alpha}{D_0 + \beta \cdot (400\text{ nm})^\alpha} \quad (S2)$$

We used the  $R$  values to compare the recruitment by membrane curvature of the different membrane systems.  $R$  is reported as the average  $\pm$  standard error of the mean (SEM) of  $N$  independent experiments (See Fig. S3 for information on  $N$  for individual systems). We used Student's t-testing to evaluate the significance of the difference in the quantified  $R$  values and drew comparisons among various membrane systems. In Fig. S3 we assigned significance levels based on the premise:  $p \leq 0.05$  (\*),  $p \leq 0.01$  (\*\*), and  $p \leq 0.001$  (\*\*\*). We found  $p = 0.00083$  for the DOPC and POPC comparison (\*\*\*),  $p = 0.0016$  for the DOPE 0% and the DOPE 50% comparison (\*\*), and  $p = 0.0063$  for the DMPC and DLPC comparison (\*\*).

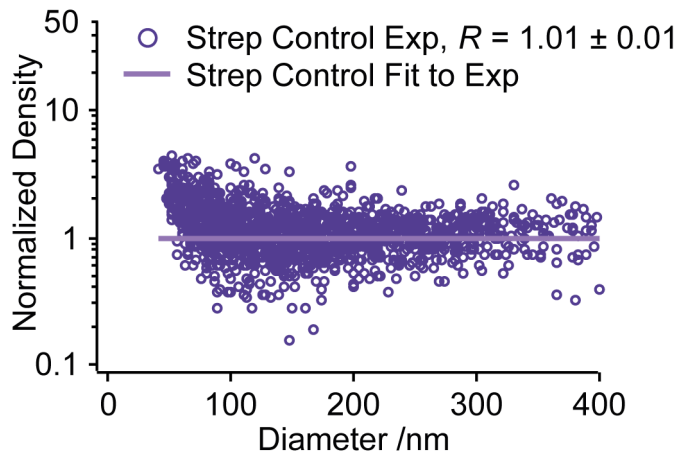

**Figure S2:** Negative control experiment of streptavidin binding to biotinylated liposomes showed no change in density as a function of diameter.

**A**

| Composition  | Fold increase<br>Exp $R$ | Fold increase<br>Theory $R$ | No Exp | Total No Points |
|--------------|--------------------------|-----------------------------|--------|-----------------|
| DOPC         | $7.4 \pm 0.4$            | 8.9                         | 9      | 9356            |
| POPC         | $31.8 \pm 6.2$           | 36.8                        | 8      | 7114            |
| Streptavidin | $1.01 \pm 0.01$          |                             | 3      | 4026            |
| 0 % PE       | $7.4 \pm 0.4$            | 8.9                         | 9      | 9356            |
| 25 % PE      | $6.4 \pm 1.7$            | 7.7                         | 3      | 3650            |
| 50 % PE      | $5.1 \pm 0.2$            | 6.5                         | 6      | 5330            |
| DMPC         | $15.4 \pm 2.9$           | 17.7                        | 7      | 3932            |
| DLPC         | $31.0 \pm 3.7$           | 28.3                        | 6      | 3714            |

**B**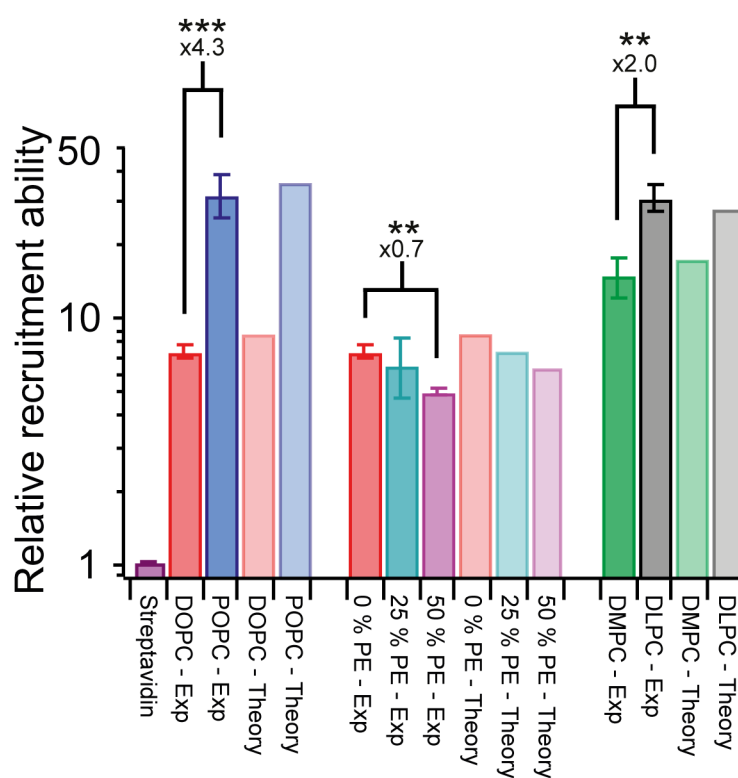

**Figure S3:** *A*) Summary of experimental and theoretical  $R$  values for all tested membrane systems. *B*) Bar chart displaying the experimental and theoretical  $R$  values for all tested membrane systems, including significance levels for the comparable compositions.

**Calculating the average absolute tN-Ras density for specific liposome diameters**



Since we acquired all data for membrane systems to be compared under identical imaging conditions, we have the ability to compare the absolute tN-Ras densities and examine how they change with liposome diameter. To do this we used the power function fit to the individual experiments, and calculated the fit function value for five different liposome diameters. We performed this operation for all experiments and calculated the average absolute tN-Ras densities and the SEM, which we present for each membrane system.

### **Molecular field theory for the analysis of the physio-chemical properties of model lipid membranes**

A molecular field theory was used to determine the thermodynamic and structural characteristics of the lipid bilayers, providing the avenue through which a mechanistic understanding of how recruitment of tN-Ras is influenced by membrane composition and curvature. The theory explicitly incorporates the conformational energy and entropy of the hydrocarbon chains of the lipid and anchor molecules (13, 14). A description of the size and shape of each of the monomeric elements is integrated into the theory via an excluded volume constraint, representing the repulsive interactions of the molecules. Together with terms accounting for the lipid headgroups and the translational mobility of the lipids, these contributions collectively form a density functional that encompasses fluctuations over all possible states of the systems. Thermodynamic information may be acquired by accessing the equilibrium states of the system, represented by the set of functions that embody the overwhelmingly most probable configurational arrangements sampled by the molecules. Acquisition of this set of functions is achieved through functional minimization with respect to the system's free variables.

The pure-component model membranes under consideration were spherical vesicles, consisting of DOPC, POPC, DLPC, and DMPC. Lipid molecular areas calculated for the planar geometries were 0.695 nm<sup>2</sup>/molecule, 0.672 nm<sup>2</sup>/molecule, 0.627 nm<sup>2</sup>/molecule, and 0.621 nm<sup>2</sup>/molecule, respectively (Table 1). These calculations were performed at 295K for DOPC and POPC. On account of DMPC's high transition temperature, DMPC bilayer calculations were performed at 305K to ensure a liquid disordered phase state. DLPC bilayers were also analyzed at 305K to make a direct comparison to the likewise fully saturated, but longer chained DMPC bilayers. All calculated molecular areas are in excellent agreement with experimental findings (15). Membrane thickness was evaluated under tensionless equilibrium conditions. The effects of membrane curvature on bilayer thickness were found to be negligible (Table S1), as expected.

Each of these lipid species have two hydrophobic tails built from a distinct number of hydrocarbon units that are either single-bonded, as with fully saturated DLPC and DMPC, or mono-unsaturated with a *cis* double-bond in one (POPC) or both (DOPC) lipid tails. The length and degree of unsaturation of each of the tails governs their accessible spatial orientations. These conformations are specified exactly, using Flory's Rotational Isomeric States Model (16), in which each successive monomer along a single chain may assume one of three possible orientations with respect to the bond-angle it forms with its predecessor. These dihedral angles are *gauche plus* (+) at 120°, *gauche minus* (-) at -120°, and *trans*, which forms a plane perpendicular to the interface at 0°. The two *gauche* conformations are thermally excited states, which exist in energy wells that confer stability to these orientations;

both contribute an increase in the internal energy by  $\varepsilon = 500$  cal/mole (16). The *trans* conformation is of the lowest energy level and is regarded as a reference state with zero energy contribution. For a comprehensive representation of the entire configurational sample space within the bilayer, we performed a series of Euler rotations on each conformation accessed by the acyl chains about the bilayer normal.

The lipid vesicle's  $N$  total number of lipids is divided between the two leaflets of the bilayer. The fractions of lipids in the inner and external leaflets are denoted  $x_I$  and  $x_E$ , respectively, and are equal to 0.5 in symmetric, planar bilayers. Molecular rearrangement ensues from curving the bilayer, altering the lipid fraction in each leaf; larger curvatures provoke more lipid translocation from the compressed internal leaf to the expanded external leaf. As such, the total area parallel to the midplane (the  $x$ - $y$  plane) of the bilayer is a function of both the curvature and the location (along the  $z$ -axis) between the two leaflets. We define the  $z$ -axis to be perpendicular to the membrane interfaces with its origin at the midplane. The total lateral area at a distance,  $z$ , within the hydrophobic core is given by

$$A(z, \mathbf{c}) = A(0) [1 + (C_1 + C_2)z + C_1 C_2 z^2] \quad (\text{S3})$$

where  $C_1$  and  $C_2$  are the principal curvatures, defined as  $C_i = 1/R_i$ ;  $R_i$  are the radii of curvature to the bilayer midplane, and  $A(0)$  is the midplane area.

The intermolecular repulsions are modeled as excluded volume interactions that are introduced as a packing constraint on the density functional. The molecular theory is solved under the constraint that the total density of the hydrophobic region is a constant (i.e. that it is incompressible). The constant density constraint implies that the average molecular area,  $a(z) = A(z)/N$ , occupied by the molecules in any layer within the hydrophobic core must be equal to the average *available* molecular area. That is,

$$a(z, \mathbf{c}) = \sum_i \sum_{\delta} x_i x_{i\delta} n_i^{\text{tails}} \langle v_{i\delta}(z) \rangle \quad (\text{S4})$$

for  $-l < z < l$ .  $\langle v_{i\delta}(z) \rangle$  are the ensemble-averaged contributions to the volume of the hydrophobic core from molecule  $i$  and the subscript  $\delta$  stands for  $I$  or  $E$ , specifying the inner or external bilayer leaf, respectively.

Terms delineating the energetic and entropic inputs to the system are explicitly written into the functional. The incompressibility constraint is enforced by the Lagrange multipliers,  $\beta\pi(z, \mathbf{c})$ , which come to physically represent the lateral pressure profile of the bilayer's hydrophobic region upon functional minimization. Minimization yields an expression for the probability of each of the molecular configurations as a function of the imposed constraints, namely, the lateral pressure. All thermodynamic parameters of interest, as well as molecular level architectural detail within our model membranes, are accessible from the consequent minimized function arising as the system's thermodynamic potential:

$$\begin{aligned}
\frac{\beta W}{N} = & \beta \gamma_0 \left\{ a(0) \left[ 1 + \left( \frac{x_{PC} a_{PC} + x_{PE} a_{PE}}{a(0)} \right)^2 \right] \right\} + \sum_i \sum_{\delta} x_i x_{i\delta} \ln \left( \frac{x_i x_{i\delta} \lambda_i^2}{a(0) e} \right) \\
& + \sum_i \sum_{\delta} \sum_{\alpha_{i\delta}} \left\{ n_i^{tails} x_i x_{i\delta} \left[ P_{i\delta}(\alpha_{i\delta}) (\ln(P_{i\delta}(\alpha_{i\delta})) + \beta \varepsilon(\alpha_{i\delta})) \right] \right\} \\
& + \int_{-l}^l \beta \pi(z, \mathbf{c}) \left\{ \sum_i \sum_{\delta} x_i x_{i\delta} n_i^{tails} \langle v_{i\delta}(z) \rangle - a(z, \mathbf{c}) \right\} dz,
\end{aligned} \tag{S5}$$

where  $\beta = 1/k_B T$  and  $\lambda$  is the thermal wavelength of the molecule. A molecule's configuration is denoted  $\alpha_{i\delta}$ ;  $\varepsilon(\alpha_{i\delta})$  is the internal energy of the lipid chains defined by the number of gauche bonds existing in configuration  $\alpha_{i\delta}$ . The first term on the right-hand side of the above equation relates the contributions of the lipid headgroups using Tanford's opposing force model (17). These contributions include the interfacial energy generated by the area of the polar headgroups in contact with water in terms of the bare oil-water surface tension  $\gamma_0 = 0.12 k_B T / \text{\AA}^2$ , and the steric penalty, or repulsion, incurred from close packing. Since PC and PE headgroups are of different sizes, the repulsion term is weighted by the mole fractions of each headgroup present. We take the two repulsive parameters to be  $a_{PC} = 36 \text{\AA}^2 / \text{molecule}$  and  $a_{PE} = 30 \text{\AA}^2 / \text{molecule}$ . The second term reflects the effect on the free energy from the translation of the lipids. The third term describes the conformational energy and internal energy of the chains and the fourth term encompasses the excluded volume repulsive interactions that are accounted for by the incompressibility constraint.

The probability distributions of the lipid chains are dependent on the molecular configurational states and the degree of curvature of the bilayer. The latter dependency is explicitly governed by the lateral pressure profile within the hydrophobic channel, conferred by the field-variables  $\pi(z, \mathbf{c})$ . These probability distributions, solved for via functional minimization, are given by the following expression:

$$P_{i\delta}(\alpha_{i\delta}, \mathbf{c}) = \frac{1}{q_{i\delta}(\mathbf{c})} \exp \left\{ -\beta \varepsilon(\alpha_{i\delta}) - \int_{-l}^l \beta \pi(z, \mathbf{c}) v_{i\delta}(z, \alpha_{i\delta}) dz \right\} \tag{S6}$$

$q_{i\delta}(\mathbf{c})$  is the single molecule partition function (normalization of the probability) defined as:

$$q_{i\delta}(\mathbf{c}) = \sum_{\alpha_{i\delta}} \exp \left\{ -\beta \varepsilon(\alpha_{i\delta}) - \int_{-l}^l \beta \pi(z, \mathbf{c}) v_{i\delta}(z, \alpha_{i\delta}) dz \right\} \tag{S7}$$

Any curved bilayer experiences an asymmetry of stress as the lipids in the exterior leaflet relax due to expansion above the midplane and as the lipids in the interior leaflet compress below the midplane. A chemical potential gradient between the bilayer leaflets is immediately established upon bending, causing lipids from the interior leaflet to diffuse to the outer leaflet to reduce the imposed stresses and chemical potential imbalance. In reference (13) we used the molecular theory to show that the amount of lipid flip-flop

between the leaflets has considerable influence on the physical properties on a curved bilayer. We introduced a term called the relaxation ratio,  $\eta = \frac{2}{l} \left( \frac{\partial x_E}{\partial C_+} \right)$ , where  $C_+$  is the sum of the principle radii of curvature. We take the relaxation ratio to be constant for all curvatures with respect to a particular lipid system, so the exterior mole fraction can be determined by the following expression for spherical vesicles:

$$x_E(R) = 0.5000 + \frac{l\eta}{R} \quad (\text{S8})$$

The relaxation ratio for each bilayer system was determined by fitting the theoretical bending modulus to those measured by experiment. Comparison of the calculated bending moduli to experimental values are listed in Table S1 (18-21).

### Calculating the Lateral Pressure Profile from the Molecular Theory

The molecular theory provides a direct route to calculating the lateral pressure profile. The lateral pressure,  $\Pi$ , is defined to be the transverse component of the pressure tensor minus the normal component of the pressure tensor (22-24). The lateral pressure is related to the surface tension,  $\gamma$ , for any geometry through the following expression (25):

$$\gamma = \int_{-\infty}^{\infty} [P_N(z, \mathbf{c}) - P_T(z, \mathbf{c})] dz = - \int_{-\infty}^{\infty} \Pi(z, \mathbf{c}) dz \quad (\text{S9})$$

The mathematical expression for the surface tension can be obtained for the molecular theory by taking the area derivative of the free energy expression (S5):

$$\beta\gamma(T, A, N, \mathbf{c}) = - \left\{ \frac{1}{a(0)} - \beta\gamma_0 \left[ 1 - \left( \frac{x_{PC}a_{PC} + x_{PE}a_{PE}}{a(0)} \right)^2 \right] + \int_{-l}^l \beta\pi(z, \mathbf{c}) dz \right\} \quad (\text{S10})$$

In order to relate equations (S9) and (S10) together we need to split the domain up into three regions. The first domain is from  $-\infty$  to  $-l$ , and this makes up the internal aqueous phase and the headgroups of the lipids that make up the inner leaflet. The second domain is from  $l$  to  $\infty$ , and this makes up the volume occupied by the headgroups of the lipids in the outer leaflet and the exterior aqueous phase. The third domain is from  $-l$  to  $l$  and this domain is the region occupied by the hydrophobic fatty-acid chains of the lipids. Utilizing these three domains, the lateral pressure profile can be written as follows:

$$\int_{-\infty}^{-l} \beta\Pi^{\text{interior}}(z, \mathbf{c}) dz + \int_l^{\infty} \beta\Pi^{\text{exterior}}(z, \mathbf{c}) dz + \int_{-l}^l \beta\Pi^{\text{hydrophobic}}(z, \mathbf{c}) dz = \frac{1}{a(0)} - \beta\gamma_0 \left[ 1 - \left( \frac{x_{PC}a_{PC} + x_{PE}a_{PE}}{a(0)} \right)^2 \right] + \int_{-l}^l \beta\pi(z, \mathbf{c}) dz \quad (\text{S11})$$

where the lateral pressure profile has been split into a sum over the three domains. The sum of the integrals over the first and second domain of the lateral pressure are equal to the sum



of the contribution of the headgroups and translational free energy of the lipids to the surface tension. The integral over the third domain of the lateral pressure is equal to the integral over the Lagrange multiplier. Mathematically, this is expressed as the following:

$$\int_{-\infty}^{-l} \beta \Pi^{\text{interior}}(z, \mathbf{c}) dz + \int_l^{\infty} \beta \Pi^{\text{exterior}}(z, \mathbf{c}) dz = \frac{1}{a(0)} - \beta \gamma_0 \left[ 1 - \left( \frac{x_{PC} a_{PC} + x_{PE} a_{PE}}{a(0)} \right)^2 \right] \quad (\text{S12})$$

$$\int_{-l}^l \beta \Pi^{\text{hydrophobic}}(z, \mathbf{c}) dz = \int_{-l}^l \beta \pi(z, \mathbf{c}) dz$$

where we see the connection between the lateral pressure and the Lagrange multiplier for the molecular theory being that they are equal inside the hydrophobic region of the lipid bilayer. A universal characteristic of every lateral pressure profile calculated from the molecular theory in this work is that the value is zero at the midplane. We will therefore call  $\beta \pi(z, \mathbf{c})$  the relative lateral pressure, since the value at each position  $z$  in the hydrophobic region is relative to the value at the midplane ( $z = 0$ ).

It is important to note the differences when comparing the lateral pressure profiles determined by the molecular theory used in this manuscript to those obtained by simulations (22-24). The lateral pressure profiles for lipid bilayers obtained by simulation all share three basic structural characteristics: 1) the value of the lateral pressure is zero far enough away from bilayer to be in the bulk aqueous domain, 2) the lateral pressure plunges to negative values in the headgroup region, and 3) the lateral pressure oscillates with an overall positive value inside the hydrophobic region (the sum of the lateral pressure inside the hydrophobic region is positive to offset the negative values in the headgroup region). The same three characteristics are conserved with the profiles obtained by the molecular theory. The headgroup regions give a net negative value that is balanced by the positive values in the hydrophobic region in order to give a zero surface tension for each bilayer studied in this manuscript. The differences between the lateral pressure profile obtained by theory and simulation inside of the hydrophobic region is due to the differences in the way the profile is calculated. With the molecular theory, the translational free energy and the contribution of the headgroups are decoupled from the contributions made by the fatty-acid tails. The simulations do not separate these contributions; however, the accounting of the overall thermodynamics of bilayer system is equivalent within the approximations made in the theory. In other words, if the simulation and theory use the same level of course-graining and the correlations were fully accounted for in the molecular theory, then the results would be identical from the point of view of the thermodynamics of the system. The reason for the difference in shape of the local lateral pressure profile is due to the contributions of the lateral pressure profiles being separated with the theory.

### Theoretical protein recruitment to model lipid membranes as a function of membrane curvature

When a bulk solution of proteins with chain anchors is in contact with a curved lipid bilayer, thermodynamics requires that the chemical potential of the chain anchor,  $\mu_A$ , must be equal in the bulk and bilayer phases:

$$\mu_A^{\text{bulk}} = \mu_A(\mathbf{c}) \quad (\text{S13})$$

The chemical potential of the chain anchors can be determined by the potential-distribution theorem (14, 26). For our molecular theory, the areal density of the proteins for a given curvature, normalized to the areal density of the proteins for a planar bilayer, is written as:

$$\frac{\rho_A(\mathbf{c})}{\rho_A(\mathbf{c}=\mathbf{0})} = \frac{\prod_{k=1}^n q_{k,E}(\mathbf{c})}{\prod_{k=1}^n q_{k,E}(\mathbf{c}=\mathbf{0})}, \quad (\text{S14})$$

where  $\rho_A(\mathbf{c})$  is the exterior aerial density of the proteins as a function of curvature. The products in this expression depend on the type of anchor motif, ranging over the partition functions,  $q_k(\mathbf{c})$ , corresponding to each anchor molecule associated with the membrane-recruited protein. The partition functions are unique for each type of chain anchor (for example, the 16-carbon fully saturated palmitoyl and the 12-carbon tri-unsaturated, branched farnesyl chain anchors associated with N-Ras). The structural variations in the chain anchors engender a distinct set of accessible configurational states to each, motivating the differences in their partition functions. By observing equation (S7), the dependency of the partition function on the lateral pressure is explicit. It is clearly illustrated theoretically that lipid anchor adsorption is regulated by the particular pressure profile assumed by the hydrophobic region of the bilayer, subject to the mediating factors of temperature, composition, and curvature (Fig. S3 and S4). Such a mechanism for protein recruitment to curved membranes is substantiated by the good agreement demonstrated between the calculated and experimental results for protein recruitment within a variety of lipid membranes by curvature.

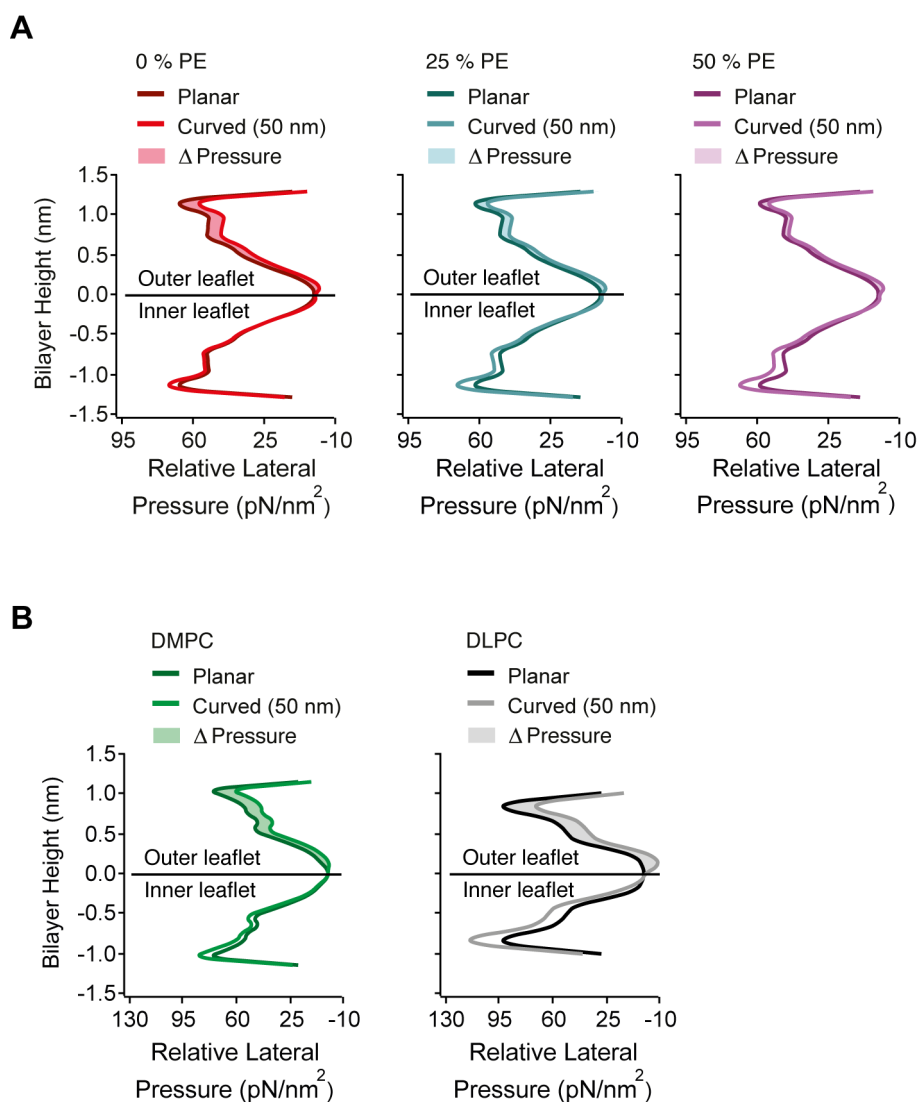

**Figure S4:** *A*) Theoretically calculated relative lateral pressure profiles along the bilayer normal for the hydrophobic region of 0 % PE, 25 % PE and 50 % PE membranes. The top part represents the outer monolayer (outer leaflet), the bottom represents the inner monolayer (inner leaflet) of the membrane and the relative lateral pressure profile is depicted for either planar (dark line) or curved (pale line, 50 nm diameter liposome) membranes. The curvature-dependent relief in the relative lateral pressure of the outer monolayer,  $\Delta P$ , is calculated as the total area between the curves (shaded area). *B*) Theoretically calculated relative lateral pressure profiles along the bilayer normal for the hydrophobic segment of DMPC (green) and DLPC (black).

It is important to note that some curvature sensing proteins, e.g. N-BAR domains, are known to operate at a high surface coverage and introduce significant membrane deformation (27), however, the theoretical calculations in this work implicitly assume that the binding of tN-Ras does not lead to membrane deformation. This assumption should be valid since we have previously shown that lipidated moieties bind at a low surface coverage (<5 %) and do not induce visible changes in membrane morphology (12, 28). This indicates that the binding of tN-Ras does not significantly alter the lateral pressure. An important corollary from the

theoretical model, however, is that any other extrinsic parameters affecting membrane lateral pressure will lead to altered tN-Ras recruitment. This could be the binding and subsequent scaffolding of other peripheral proteins, the lateral segregation of transmembrane proteins, or interactions between the membrane and the cell cytoskeleton. All would provide the cell with additional means to tune the local density of lipidated proteins and provide feed-back regulation through the modulation of the lateral pressure profile.

### Strong correlation between $R$ values and the curvature dependent % change in lateral pressure

To further try to elucidate the underlying biophysical mechanism for the curvature- and compositional dependent recruitment of tN-Ras we extracted the % change in either the area per lipid or the lateral pressure when curving the membrane from flat to 50 nm. We plotted these values against the experimentally determined  $R$  values and even though the relative differences in the curvature dependent % change in the area per lipid between different membrane systems are small we still see a tendency towards a larger % area change resulting in a higher  $R$  value (Fig. S5 A). A much stronger tendency was seen for the curvature dependent % change in lateral pressure, a value for which we see a larger difference between the different membrane systems and which displays an almost linear dependence with the  $R$  values for the whole range of pressure changes (Fig. S5 B). This very strong correlation further substantiates modulations of the lateral pressure as the underlying mechanism for the compositional and curvature mediated recruitment of tN-Ras.

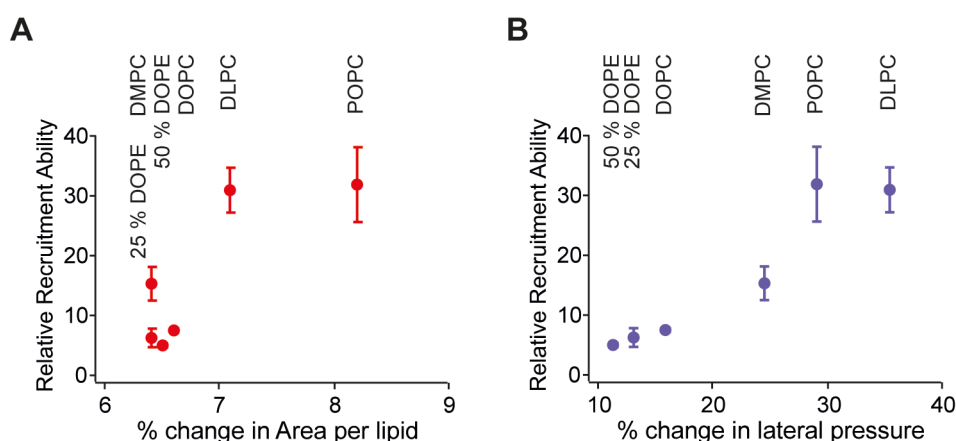

**Figure S5:** A) Experimentally determined  $R$  values versus the theoretically calculated curvature dependent % change in the area per lipid. B) Experimentally determined  $R$  values versus the theoretically calculated curvature dependent % change in the lateral pressure.

### Supporting References



1. McIntosh, T. J., and S. A. Simon. 2006. Roles of bilayer material properties in function and distribution of membrane proteins. *Annu. Rev. Bioph. Biom.* 35:177-198.
2. Kucerka, N., J. Pencer, J. N. Sachs, J. F. Nagle, and J. Katsaras. 2007. Curvature effect on the structure of phospholipid bilayers. *Langmuir* 23:1292-1299.
3. Kollmitzer, B., P. Heftberger, M. Rappolt, and G. Pabst. 2013. Monolayer spontaneous curvature of raft-forming membrane lipids. *Soft Matter* 9:10877-10884.
4. Kooijman, E. E., V. Chupin, N. L. Fuller, M. M. Kozlov, B. de Kruijff, K. N. J. Burger, and P. R. Rand. 2005. Spontaneous curvature of phosphatidic acid and lysophosphatidic acid. *Biochemistry* 44:2097-2102.
5. Zimmerberg, J., and M. M. Kozlov. 2006. How proteins produce cellular membrane curvature. *Nat. Rev. Mol. Cell Biol.* 7:9-19.
6. Kamal, M. M., D. Mills, M. Grzybek, and J. Howard. 2009. Measurement of the membrane curvature preference of phospholipids reveals only weak coupling between lipid shape and leaflet curvature. *Proc. Natl. Acad. Sci.* 106:22245-22250.
7. Orsi, M., J. Michel, and J. W. Essex. 2010. Coarse-grain modelling of DMPC and DOPC lipid bilayers. *J. Phys.-Condes. Matter* 22.
8. Marsh, D. 2007. Lateral pressure profile, spontaneous curvature frustration, and the incorporation and conformation of proteins in membranes. *Biophys. J* 93:3884-3899.
9. Strandberg, E., D. Tiltak, S. Ehni, P. Wadhvani, and A. S. Ulrich. 2012. Lipid shape is a key factor for membrane interactions of amphipathic helical peptides. *BBA - Biomembranes* 1818:1764-1776.
10. Larsen, J., N. S. Hatzakis, and D. Stamou. 2011. Observation of Inhomogeneity in the Lipid Composition of Individual Nanoscale Liposomes. *J. Am. Chem. Soc.* 133:10685-10687.
11. Elizondo, E., J. Larsen, N. S. Hatzakis, I. Cabrera, T. Bjornholm, J. Veciana, D. Stamou, and N. Ventosa. 2012. Influence of the preparation route on the supramolecular organization of lipids in a vesicular system. *J. Am. Chem. Soc.* 134:1918-1921.
12. Larsen, J. B., M. B. Jensen, V. K. Bhatia, S. L. Pedersen, T. Bjørnholm, L. Iversen, M. Uline, I. Szleifer, K. J. Jensen, N. S. Hatzakis, and D. Stamou. 2015. Membrane curvature enables N-Ras lipid anchor sorting to liquid-ordered membrane phases. *Nat. Chem. Biol.* 11:192-194.
13. Uline, M. J., and I. Szleifer. 2013. Mode specific elastic constants for the gel, liquid-ordered, and liquid-disordered phases of DPPC/DOPC/cholesterol model lipid bilayers. *Faraday Discuss.* 161:177-191.
14. Uline, M. J., G. S. Longo, M. Schick, and I. Szleifer. 2010. Calculating Partition Coefficients of Chain Anchors in Liquid-Ordered and Liquid-Disordered Phases. *Biophys. J* 98:1883-1892.
15. Poger, D., and A. E. Mark. 2010. On the Validation of Molecular Dynamics Simulations of Saturated and cis-Monounsaturated Phosphatidylcholine Lipid Bilayers: A Comparison with Experiment. *J. Chem. Theory Comput.* 6:325-336.
16. Flory, P. J. 1969. *Statistical Mechanics of Chain Molecules*. Wiley-Interscience, New York.
17. Israelachvili, J. N. 1991. *Intermolecular and Surface Forces*. Academic Press, Elsevier.

18. Rawicz, W., K. C. Olbrich, T. McIntosh, D. Needham, and E. Evans. 2000. Effect of chain length and unsaturation on elasticity of lipid bilayers. *Biophys. J* 79:328-339.
19. Arriaga, L. R., I. Lopez-Montero, F. Monroy, G. Orts-Gil, B. Farago, and T. Hellweg. 2009. Stiffening Effect of Cholesterol on Disordered Lipid Phases: A Combined Neutron Spin Echo plus Dynamic Light Scattering Analysis of the Bending Elasticity of Large Unilamellar Vesicles. *Biophys. J* 96:3629-3637.
20. Kucerka, N., Y. F. Liu, N. J. Chu, H. I. Petrache, S. Tristram-Nagle, and J. F. Nagle. 2005. Structure of fully hydrated fluid phase DMPC and DLPC lipid bilayers using X-ray scattering from oriented multilamellar arrays and from large unilamellar vesicles. *Biophys. J* 88:245A-245A.
21. Dimova, R. 2014. Recent developments in the field of bending rigidity measurements on membranes. *Adv. Colloid Interface Sci.* 208:225-234.
22. Gullingsrud, J., and K. Schulten. 2004. Lipid bilayer pressure profiles and mechanosensitive channel gating. *Biophys. J* 86:3496-3509.
23. Sodt, A. J., R. M. Venable, E. Lyman, and R. W. Pastor. 2016. Nonadditive Compositional Curvature Energetics of Lipid Bilayers. *Phys. Rev. Lett.* 117.
24. Orsi, M., and J. W. Essex. 2013. Physical properties of mixed bilayers containing lamellar and nonlamellar lipids: insights from coarse-grain molecular dynamics simulations. *Faraday Discuss.* 161:249-272.
25. Rowlinson, J. S., and B. Widom. 1982. *Molecular Theory of Capillarity*. Dover Publications, New York.
26. Widom, B. 1982. Potential-distribution Theory and the Statistical-mechanics of Fluids. *J. Phys. Chem.* 86:869-872.
27. Peter, B. J., H. M. Kent, I. G. Mills, Y. Vallis, P. J. G. Butler, P. R. Evans, and H. T. McMahon. 2004. BAR domains as sensors of membrane curvature: The amphiphysin BAR structure. *Science* 303:495-499.
28. Hatzakis, N. S., V. K. Bhatia, J. Larsen, K. L. Madsen, P. Y. Bolinger, A. H. Kunding, J. Castillo, U. Gether, P. Hedegard, and D. Stamou. 2009. How curved membranes recruit amphipathic helices and protein anchoring motifs. *Nat. Chem. Biol.* 5:835-841.
